# Supplementary material for: Measurement on PM and its chemical compositions for real-world emissions from non-road and on-road diesel vehicles
Source: Copernicus journal article supplement (doi:10.5194/acp-2016-1038), 2016-12-06
Supplement: Supplementary file [file acp-2016-1038-AC2-supplement.zip]

# Measurement ~~on~~of PM and its chemical compositions ~~for~~in real-world emissions from non-road and on-road diesel vehicles

Min Cui<sup>a</sup>, Yingjun Chen<sup>a\*</sup>, Yanli Feng<sup>b\*</sup>, Cheng Li<sup>c</sup>, Junyu Zheng<sup>c\*</sup>, Chongguo Tian<sup>d</sup>,

5 Caiqing Yan<sup>e</sup>, Mei Zheng<sup>e</sup>

<sup>a</sup> Key Laboratory of Cities' Mitigation and Adaptation to Climate Change in Shanghai  
(China Meteorological Administration), College of Environmental Science and  
Engineering, Tongji University, Shanghai, China

<sup>b</sup> Institute of Environmental Pollution and Health, School of Environmental and  
10 Chemical Engineering, Shanghai University, Shanghai, China

<sup>c</sup> Laboratory for Atmospheric Research and Environmental Simulation, School of  
Environment and Energy, South China University of Technology, Guangzhou, China

<sup>d</sup> Key Laboratory of Coastal Zone Environmental Processes and Ecological  
Remediation, Yantai Institute of Coastal Zone Research, Chinese Academy of  
15 Sciences, Yantai, China

<sup>e</sup> State Key Joint Laboratory of Environmental Simulation and Pollution Control,  
College of Environmental Sciences and Engineering, Peking University, Beijing,  
China

Correspondence to: Yingjun Chen ([yjchentj@tongji.edu.cn](mailto:yjchentj@tongji.edu.cn))

20 Yanli Feng ([fengyanli@shu.edu.cn](mailto:fengyanli@shu.edu.cn))

Junyu Zheng ([Zhengjunyu\\_work@hotmail.com](mailto:Zhengjunyu_work@hotmail.com))

**Abstract.** With ~~increasing population~~ the rapid growth in the number of both  
non-road and on-road diesel vehicles, the adverse effects of particulate matter (PM-)  
and its ~~compositions-constituents~~ (such as elemental carbon (EC), and pPolycyclic  
25 aromatic hydrocarbons (PAHs)), on air quality and human health ~~get~~ have been  
receiving more and more increasing attention. However, studies on the characteristics  
of PM and its composition whichs emitted from diesel vehicles are scarce, particularly

~~those measured under performed in~~ real-world conditions, ~~are scarce~~. In this study, six excavators and five trucks, involving ~~a wide-range of~~ emissions standards and ~~working in different operating operational~~ modes, were tested to characterize PM constituents, ~~of PM~~ (including organic carbon (OC), EC, water soluble ions (WSIs), elements, and organic species such as PAHs, n-alkanes, hopanes, and steranes). The average emission factors ~~of for~~ PM ( $EF_{PM}$ ) ~~for from~~ excavators and trucks were  $829 \pm 806$  and  $498 \pm 234$  mg kg<sup>-1</sup> fuel, respectively, which ~~are~~ are similar to values found in comparable with other studies. ~~However,~~  $EF_{PM}$  was significantly affected by fuel quality, ~~operating operational~~ mode, and emission standards. ~~High~~ A significant correlation ( $R^2=0.79$ ,  $p<0.01$ ) ~~existed was found~~ between the  $EF_{PM}$  for excavators and the sulfur contents in fuel. The highest average  $EF_{PM}$  ~~under for~~ working mode for excavators was  $904 \pm 979$  mg kg<sup>-1</sup> fuel, ~~due to because of the~~ high engine load ~~required in this mode, under this mode~~. From pre-stage 1 to stage 2 emission standards, the average  $EF_{PM}$  for excavators ~~with different emission standards~~ decreased by 58%. ~~Similarly, for~~ trucks, the average non-highway  $EF_{PM}$  under ~~non-highway condition~~ ( $548 \pm 311$  mg kg<sup>-1</sup> fuel) was higher than ~~those under the~~ highway ~~condition~~  $EF_{PM}$  ( $497 \pm 231$  mg kg<sup>-1</sup> fuel). Meanwhile, the reductions when switching from China II and ~~China~~ III to China IV standards were ~~63.53.5%~~ and ~~65.65.6%~~, respectively. Generally, the PM compositions emitted from excavators was dominated by OC ( $39.2\% \pm 21.0\%$ ) and, EC ( $33.3\% \pm 25.9\%$ ), ~~and~~ while PM for trucks, PM was dominated by EC ( $26.9\% \pm 20.8\%$ ), OC ( $9.89\% \pm 12\%$ ), and WSIs ( $4.67\% \pm 5.74\%$ ). Several differences ~~of in~~ compositions were observed among the various ~~operating operational~~ modes, emission standards, and fuel ~~quality~~ qualities. The average OC/EC ratios ~~under idling and working modes for~~ idling and working excavators were 3 ~~and to~~ 4 times higher than those ~~in for~~ moving ~~modese~~ excavators. Although the  $EF_{PM}$  for excavators and trucks was reduced by the constraint of ~~with~~ stringent emission standards, the ~~fractions of elemental~~ fractionss for excavators ranged from 0.49% to 3.03% from pre-stage 1 to stage 2, and the fraction of WSIs for the China IV truck was 6-fold higher than ~~those from they were for the~~ other trucks. Furthermore, as compared with ~~the results from~~ other diesel vehicles, wide ranges ~~of~~

in the ratios of benzo[a]anthracene/(benzo[a]anthracene+chrysene) (0.26-0.86), indeno[1,2,3-cd]pyrene/(indeno[1,2,3-cd]pyrene +benzo[ghi]perylene) (0.20-1.0) and fluoranthene/(fluoranthene+pyrene)BaA/(BaA+Chry) (0.26-0.86), IcdP/(IcdP+BghiP) (0.20-1.0) and Flua/(Flua+Pry) (0.24-0.87) for excavators, which may-might be attributed to a result of the complex characteristics of excavator operating-operational modes for excavators. Although Similar fractions of the total-16 priority-PAHs (as identified by the U.S. Environmental Protection Agency) were found in the exhaust from the for excavators and trucks-were similar, the-The equivalent concentrations of total-of benzo[a]pyrene, BaP<sub>eq</sub> that-which was-were used to evaluate-the carcinogenic risk, was-were 31 times higher for excavators than those they were for trucks. Therefore, implying that more attention should be paid to non-road vehicle's emissions.

## Keywords

Diesel vehicles; excavators; trucks; PM; chemical composition; impact-influential factors

## Copyright statement

We confirm that the material is original and has not been submitted elsewhere.

## 1. Introduction

Particulate matter (PM) emitted from diesel vehicles have-has significantly adverse impacts-effects on air pollution-quality, human health, and global climate change, and therefore merit close should-be-examined-examination closely (Aggarwal et al., 2015, 2016). Many-Previous studies have reported that diesel vehicles exhaust was-is-a-a major source of ambient PM emissions ( $D_p \leq 100 \mu m$ ) emissions-in-ambient PM (Oanh et al., 2010, Zhang et al., 2015b). For example-instance, it-is-reported-that-vehicle exhaust was reported to-contributed-contribute to almost 30% of ambient PM emissions-in-ambient PM in 9 cities in-of China in 2015 (MEP 2016). The International Agency for Research on Cancer (IARC) found that exposure to diesel exhaust causes lung cancer (IARC 2012). It-is-Adar et al. (2015)-reported that more

than 25 million children breathe polluted air on ~~diesel school~~ diesel school buses, which then causing causes a disproportionate occurrence of adverse respiratory disease health (Adar et al., 2015). Nearly 34% of element carbon (EC) emission emissions, a major contributor to current global warming and poor human health, accounts comes for nearly 34% from off-road diesel vehicles in the USA (USEPA 2015).

The populations numbers of on-road and non-road diesel vehicles have have increased considerably in China, and have contributed to especially for non-road diesel vehicles, causing severe emissions situation problems. On-road diesel vehicles can be classified as light-duty, medium-duty, and heavy-duty trucks. Non-road diesel vehicles mainly include construction machinery and agricultural equipment (MEP 2014). Airplanes, trains, and vessels are not included as non-road diesel vehicles in this study, because the primary fuels used for these vehicles does not include diesel. According to reports, ~~t~~The number of on-road diesel vehicles increased from 11.0 million in 2009 to 32.8 million in 2015, and the number of while the number of non-road diesel vehicles increased from 20.6 million in 2006 to 33.6 million in 2012 (CCCMY et al., 2013, MEP 2016). According to Based on the China vehicle environmental management annual report for 2015 (MEP 2016), 0.56 million tons of PM were emitted from on-road mobile sources and almost higher more than 90% of PM came resulted from on-road diesel vehicles emissions in 2015 (Figure S1). However, pollutants emitted from non-road diesel vehicles should not be neglected. In 1991, The U.S. Environmental Protection Agency (USEPA) published a report indicating that PM emitted from non-road diesel vehicles was significantly higher than that emitted from on-road diesel vehicles (USEPA 1991). Wang et al. (2016) estimated the an emission inventory from for non-road equipment (including agricultural equipment, river/ocean-going vessels, locomotives, and commercial airplanes) and found that there are were 349 thousand tons Gg of PM emissions from non-road vehicles in China in during 2012. Construction equipments was the largest source of PM emissions from non-road diesel vehicles. According to Zhang et al. (2010) reported that Pearl River Delta (PRD) region's PM emissions from

~~construction instruments~~equipment ~~—in the Pearl River Delta (PRD) region~~  
~~significantly accounted for 26.5% of the total emission from non-road vehicles in~~  
~~2006.~~ As aAn important type of non-road diesel vehicle, the number of construction  
~~instruments—equipment in China~~ increased from 1.97 million to 5.85 million ~~between~~  
5 ~~during 2006 to and~~ 2012 ~~in China~~ (CCCMY 2013). ~~According to Zhang et al. (2010)~~  
~~Pearl River Delta (PRD) region's PM emission from construction instruments~~  
~~significantly accounted for 26.5% of the total non-road vehicles in 2006.~~ Furthermore,  
~~As as~~ one of the most abundant types of construction~~instruments~~ equipment (Figure  
S1), excavators contribute diesel consumption and PM emission from excavators were  
10 ~~7450 and 34.8 thousand tons in 2007~~almost ~~—65% of the PM emissions from~~  
~~construction equipment~~ (Li et al., 2012).

In order to control ~~diesel vehicles~~PM emissions pollution ~~from diesel vehicles~~,  
China ~~has—began~~started to implement emission standards ~~early—in~~ early 2001 for  
light-duty diesel vehicles and heavy-duty diesel vehicles (SEPA et al., 2001). ~~Those~~  
15 ~~These~~ standards ~~have been~~were tightened ~~in the subsequent 12 years~~, from ~~the~~ China I  
to China V ~~standards—in 12 years~~. Although emission standards for on-road diesel  
vehicles ~~were—were~~ formulated ~~to—in~~ China V, insufficient diesel fuel quality ~~slows~~  
~~their retards~~implementationg of emission standards (Yue et al., 2015). ~~In addition,~~  
~~The—the~~ China IV emission standards for on-road diesel vehicles are not fully  
20 implemented~~—until now~~. Compared with on-road diesel vehicles, ~~t~~The implementing  
~~implementation~~ timeline for of emission standards for non-road diesel vehicles ~~has~~  
lagged behind ~~that of the on-road diesel vehicles~~. China ~~has—~~implemented two  
emission standards for new non-road diesel engines, stage 1 and stage 2, in 2007 and  
2009, respectively. ~~Furthermore~~However, this first ~~implemented—implementation~~  
25 ~~time—in~~ China was 7 years later ~~than implementation in the compared with the~~ USA  
(USEPA 2003, SEPA et al., 2007). ~~The pollution emissions limits for on-road and~~  
~~non-road diesel vehicles are given in Tables S1 and S2.~~

~~The fundamental work of~~EF<sub>PM</sub> ~~that is~~ an important parameter in the compilation of  
emission inventor~~iesy~~ for on-road and non-road diesel vehicles in China. ~~However,~~  
30 ~~the foundational work towards quantifying~~ EF<sub>PM</sub> is relatively weak and ~~contains large~~

uncertainties (Huang et al., 2011). ~~Recently, m~~Most of the  $EF_{PM}$  from trucks have been measured using tunnel and dynamometer tests, which do not allow for evaluating influential factors for PM emissions from a single truck in real-world conditions (Alves et al., 2015b, Mancilla et al., 2012, Pio et al., 2013). ~~used in emission inventory research came from developed countries. Several studies have measured PM emissions from trucks using on-board tests in real-world conditions~~ (Wu et al., 2016, Wu et al., 2015, Zhang et al., 2015b). ~~Because the  $EF_{PM}$  emitted from trucks could change along with improved emission standards, data should be updated frequently~~ (Huo et al., 2012). ~~Wang et al. (2016) estimated emission inventory from non-road equipment and suggested that real world measurements of emissions for non-road equipment are desperately needed. Along with increasingly serious environmental problems, PM emission from on-road diesel vehicles has been taken seriously in China. There are considerable studies about on-road tests to study PM from on-road diesel vehicles. Wu et al. (2015) tested 17 in-use diesel trucks in Beijing using a portable emission measurement system (PEMS) and calculated the  $EF_{PM}$  of those vehicles. Moreover, Zhang et al. (2015b) measured the real world PM emission factors from in-use HDDTs using PEMS. In addition, the data for  $EF_{PM}$  emitted from non-road diesel vehicles on in real-world conditions was is scarce in China. To our knowledge, dynamometer test was used by most of studies to research non-road vehicle emission (Liang et al., 2005, Liu et al., 2015, Pietikainen et al., 2015). Liu et al. (2015) measured the PAH and nitro-PAH emission from non-road diesel engine, which was conducted utilizing the dynamometer test cycles required by U.S. EPA Tier 4 Final standards. In 2014, the Ministry of Environmental Protection of the People's Republic of China had issued "Technical guide for the preparation of a single source emission inventory of atmospheric fine particulate matter." However, no measured baseline for emission factors of PM from non-road vehicles, especially construction machinery ( $6 \text{ g km}^{-1}$  were predicted for uncontrolled standards) could be found in this technical guide (MEPPRC 2014). Until now, there was only one study in China by Fu et al. (2012), who provided  $EF_{PM}$  for tested 12 excavators using portable emission measurement system (PEMS) PEMS to determine PM emission factors under for~~

different ~~working-operational~~ modes. ~~However,~~ on-board measurements need to be expanded to improve localization of EF<sub>PM</sub> for non-road diesel vehicles in China as soon as possible, due to because of the complexity of real-world conditions, ~~including such as~~ lagging diesel quality and changing emission standards, ~~the on-board measurements need to be expanded to improve localization of EF<sub>PM</sub> for on-road and non-road diesel vehicles in China as soon as possible.~~

Analysis of the Chemical-chemical composition of PM constituents are-is ~~essentialimportant~~ for ~~studies-of~~ source apportionment, human health, and climate change studies. Primary PM emitted from diesel vehicles contains a variety of chemical ~~compositionscomponents~~, such as including organic carbon (OC), elemental carbon (EC), water soluble ions (WSIs), elements, and organic species ~~(such as~~ n-alkanes, polycyclic aromatic hydrocarbons (PAHs), hopane and sterane). Several previous field studies ~~have-have~~ focused on chemical compositions of PM emitted from diesel vehicles. Zhang et al. (2015b) characterized PM compositions (OC, EC, WSIs and elements) ~~emission-emitted~~ from heavy-duty diesel trucks (HDDTs). Wu et al. (2016) reported the detailed chemical composition of PM<sub>2.5</sub> emitted from China III and China IV diesel trucks, including the ~~organic carbon (OC), elemental carbon (EC),~~ water soluble ions (WSIs), and element contents, ~~emitted from China III and China IV diesel trucks.~~ In 2012, Fu et al. (2012) tested 12 excavators in the first on-board test for excavators in China, but to-determine-only optically-based PM-emission factors EF<sub>PM</sub> were given, which was the first on-board test for excavators in China. ~~However,~~ Therefore, the specific characteristics of PM emitted from diesel vehicles and its compositions ~~emitted from diesel vehicles are still largely unknown,~~ especially for organic ~~matterscompounds, are-lacking.~~

In this study, PM ~~and its composition~~ emitted from on-road and non-road diesel vehicles ~~were-was~~ measured ~~in-order~~ to (I) test emission factors of PM for excavators and trucks under-in real-world conditions; (II) identify influential impact-factors of-on the emitted PM and its compositions ~~for non-and-on-road diesel vehicles;~~ and (III) characterize chemical components of-present in the emitted PM ~~from-excavators-and trucks.~~ The study results required substantial effort results of this study could

and provide valuable information for use in the development of effective control policies and for reducing PM emissions from excavators and trucks.

## Experimental

### 2.1 Diesel vehicles and operational modes selection

In this study, six excavators and five trucks were selected to cover a wide range of emission standards, manufacturers and engine loads. ~~The d~~Detailed information ~~of for~~ the selected excavators and trucks is is shown in Table 1. ~~The tested excavators were divided into two groups based on their emission standards: three pre stage 1 excavators and three stage 2 excavators.~~ As shown in Figure ~~S1~~S2, the annual productions of excavators ~~have did~~ not changed substantially much in between 2007 and -2009 (an increase from 70,000 to 85,000 excavators), during which stage 1 non-road vehicle emission standards was implemented, varying from 70,000 to 85,000 pieces of excavators. Therefore, excavators ~~conducted produced~~ with pre-stage 1 and stage 2 emission standards were chosen in for this study. Based on China national standard (SEPA 2007), excavators ~~can are be~~ divided into five types ( $0 < P < 8$  kw;  $8 < P < 18$  kw;  $18 < P < 37$  kw;  $37 < P < 75$  kw;  $75 < P < 130$  kw;  $130 < P < 560$  kw) according to the their rated power rating(P). ~~Thus, each type of e~~The excavators were categorized for this study divided by by emission standards and were rated as~~included~~ low (0-75 kw), medium (75-130 kw) and or high (130-560 kw) ~~excavators power, which represent the low, medium and high power excavators, respectively. As a way to For reflecting the real actual operation use environments, three operating operational modes were selected for the excavators were selected \_idling mode, moving mode and working mode, respectively. Further descriptions of these three modes can be found were listed in Fu et al. (2012). In this study In addition, consistent sampling times for the different modes were not strictly required in this study, as long as sufficient amounts of PM were collected to conduct the subsequent chemical analysis. The average average duration consumption sampling times in during idling, moving, and working were were 41.7, 24.0, and 28.5 minutes, respectively.~~

~~For diesel trucks, there were three~~ Three types of diesel trucks were selected according to emission standards, one China II standards truck, three China III

~~standards~~ trucks, and one China IV ~~standards~~ truck. ~~Practicality~~~~The, just~~ China III trucks ~~contained~~~~included three trucks including one each of~~ light-duty, medium-duty, and heavy-duty diesel trucks. Based on the traffic ~~control measures~~~~rules~~ and driving conditions ~~of for~~ on-road diesel trucks, ~~different~~ pre-designed routes were chosen for ~~different emission standards and size testing the~~ trucks in Yantai, Shandong province ~~in of~~ China (Figure 1). ~~Because different trucks drove on different routes, the selected routes in this study were divided into non-highway and highway categories.~~ The ~~selected~~ routes ~~chosen~~ for China III and China IV light-duty trucks included ~~arterial road~~~~non-highway 1 (non-highway 1), secondary road (non-highway 2) non-highway 2~~ and highway 1. The lengths of ~~those~~~~these three~~ roads were 19, 35 and 17 km, respectively. The route chosen for ~~the~~ China II heavy-duty truck (~~yellow label~~) was ~~special used for “yellow label car” (non-highway 3) non-highway 3~~ which was 25 km. The routes chosen for China III medium-duty and heavy-duty trucks included non-highway ~~4-4~~ and highway 2. The lengths of ~~those~~~~these~~ ~~two~~ roads were 47 and 23 km, respectively. The detailed ~~ed~~ velocity and road grade information for all of the tested routes ~~were are~~ shown in Figures S~~32~~ and S~~3~~S~~4~~.

~~Although repeated tests were conducted for some vehicles, it should be noted that only one set of integral data was selected for further discussion, due to the incompleteness of some monitoring data (e.g. CO<sub>2</sub> and CO concentrations). As shown in Tables S3 and S4, the variability in test times for the same operational mode was considered acceptable. Some actions were required to reduce the uncertainty. For example, we combined sampling filters for the repeated experiments for vehicles T1 and T3 to carry out organic compound analysis.~~

## 2.2 On-board emission measurement system

The on-board emission measurement system was ~~self~~-designed and ~~combined constructed~~ in ~~our our~~ laboratory (Figure 2). ~~The A~~ description of the ~~used~~ on-board emissions test system was given ~~by in~~ our ~~previous previous study report~~ (Zhang et al., 2015b). Briefly, this system ~~has consists of~~ two main ~~functional parts~~~~components~~, ~~including a~~ Photon II ~~analyzer, which was used to analyze the for~~ flue gas (HC, CO, CO<sub>2</sub>, SO<sub>2</sub>, ~~and~~ NO<sub>x</sub>) ~~analyzer~~, and a PM ~~sampler sampling~~ system. The PM

sampler system ~~consists-consisted~~ of a dilution system ~~followed by,~~ and five exhaust channels ~~behind this dilution system~~. Two channels were connected ~~with-to~~ PM samplers, and the others ~~three~~ were blocked. ~~When-Before sample-sampling~~ the PM ~~-~~emitted from ~~an~~ excavators, ~~the~~ emission measurement system was put on a truck ~~and~~ connected to the excavators exhaust ~~tube via-by a~~ stainless steel pipe. ~~The system showed clear improvements over other on-board instruments, such as PEMSs and FPS4000 (Zheng et al., 2015), with better portability and the ability to collect filter samples for further chemical analysis in the laboratory. The results presented here include the first dataset from on-board measurement of non-road diesel vehicle exhaust in China.~~

## 2.3 Chemical analysis

### 2.3.1 Fuel quality analysis

Fuel quality has a ~~great-large~~ effect on PM emissions from vehicles (Cui et al., 2016, Liang et al., 2005, Zhang et al., 2014). ~~Due-to~~ ~~Since the poor-fuel quality-used in~~ excavators ~~is often of poor quality~~, diesels ~~for-was collected from~~ each of the tested excavators ~~were-collected-and~~ ~~-analyzed-tested~~. The results ~~for-of~~ fuel quality analysis ~~were-are shown-given~~ in Table 2. Comparing the diesel quality used in this study with the diesel quality standards for non-road vehicles (GB 252-2015) (SEPA et al., 2015), it was found that ~~most-of~~ the sulfur contents ~~in most in-of the~~ diesels used in this study ~~(200-1100 ppm)~~ were higher than ~~those-allowed in-by~~ GB 252-2015 ~~(<350 ppm)~~. Additionally, the sulfur content in the diesel used by E4 was 1100 ppm, ~~which was much~~ higher than ~~those-that in-diesel-used for-in the~~ other excavators. Furthermore, the ash content of ~~E4's~~ diesel ~~used by E4~~ was 4.16%, about ~~therefore~~ 420 times higher than the limit ~~value-given in-by~~ GB 252-2015.

### 2.3.2 PM and chemical composition analysis

~~Quartz-fiber filters were used for collecting the PM samples because the weight losses of these filters could be neglected through strict sampling processes, and quartz-fiber filters could be used for both the PM weight measurement and chemical analysis. The~~ ~~The quartz-fiber~~ filters were weighed before and after sampling to determine ~~the collected PM~~ mass concentrations ~~-of PM~~. Before each weighing, ~~the~~

filters were balanced at 25 °C and 40% relative humidity for 24 h. ~~The Each~~ filters ~~were was~~ weighed ~~there three~~ times ~~before and after sampling to insure that the error for each measurement was as low as possible~~. WSI<sub>s</sub> were analyzed ~~by using~~ ion chromatography (Dionex ICS3000, Dionex Ltd., America) following the method of Cui et al. (2016). Elements ~~was analysis was performed~~ analyzed using inductively coupled plasma ~~coupled with~~ mass spectrometry (ICP-MS<sub>+</sub>; ELAN DRC II type, Perkin Elmer Ltd., Hong Kong).

Because ~~the there was not enough~~ organic matters on each filter ~~was insufficient for quantification~~, we ~~combined merged filters from~~ different ~~operating operational~~ modes or ~~driving routes~~ filters ~~for analysis analyzing for~~ each diesel vehicles ~~according based to on~~ the proportion of ~~sampling tested~~ time ~~during each mode or route~~. Quartz filter samples ~~were~~ spiked with internal standards (including acenaphthene-*d*<sub>10</sub>, benzo[*a*]anthracene-*d*<sub>12</sub>, pyrene-*d*<sub>10</sub>, coronene-*d*<sub>12</sub>, cholestane-*d*<sub>4</sub>, *n*-C<sub>15</sub>-*d*<sub>32</sub>, *n*-C<sub>20</sub>-*d*<sub>42</sub>, *n*-C<sub>24</sub>-*d*<sub>50</sub>, *n*-C<sub>30</sub>-*d*<sub>58</sub>, *n*-C<sub>32</sub>-*d*<sub>66</sub>, *n*-C<sub>36</sub>-*d*<sub>74</sub>) ~~were and~~ ultrasonically extracted two times in 30 ~~ml mL~~ of a 1:1 mixture of hexane and dichloromethane for 10 min. All extracts ~~for from~~ each sample were combined, filtered and concentrated to ~~~approximately~~ 0.5 ~~ml mL~~.

Organic species including *n*-alkanes, PAHs, hopane and sterane were analyzed using GC-MS (Agilent 7890A GC-5975C MS) ~~equipped~~ with a DB-5MS column (length 30 m × i.d. 0.25 mm × thickness 0.25 μm). ~~The~~ GC operating program was as ~~following follows~~: 60 °C ~~with static time off for~~ 4 min, ~~increase~~ 5 °C min<sup>-1</sup> ~~to 150 °C with 2 min static time to 150 °C with static time of 2 min~~, then ~~ramped increase~~ 3 °C min<sup>-1</sup> to 306 °C ~~at rate of 3 °C min<sup>-1</sup> with a 20 min static time of 20 min; and~~ ~~The GC conditions had an~~ injector temperature ~~was of~~ 290 °C, ~~injector~~ volume of ~~injector was~~ 2 μL, ~~helium~~ carrier gas ~~was helium, and gas~~ flow rate of ~~gas was~~ 1.2 ~~ml mL~~ min<sup>-1</sup>. The electron impact (EI) mode at 70 eV and selected-ion-monitoring (SIM) mode were selected to ~~determining determine concentrations of~~ PAHs, hopane, and sterane. For organic matters, ~~the~~ blank samples and recovery rates ~~(66.7%-128% for five surrogates)~~ were measured. The blank concentrations were subtracted from ~~the~~ sample concentrations.

The ~~PM Chemical-chemical~~ constituents ~~of PM~~ analyzed in this study ~~are~~ ~~were listed as follows:~~ OC<sub>1</sub>, EC<sub>1</sub>, WSIs: SO<sub>4</sub><sup>2-</sup>, NO<sub>3</sub><sup>-</sup>, Cl<sup>-</sup>, NH<sub>4</sub><sup>+</sup>; ~~Elements~~elements: Na, Mg, K, Ca, Ti, V, Cr, Mn, Fe, Co, Ni, Cu, Zn, Pb); n-alkanes: C12 ~~to~~ C40; ~~the~~ sixteen ~~USEPA~~ priority PAHs ~~of~~ naphthalene (Nap), acenaphthylene (Acy), acenaphthene (Ace), fluorine (Flu), phenanthrene (Phe), anthracene (Ant), fluoranthene (Fluo), pyrene (Pyr), benzo [a]anthracene (BaA), chrysene (Chry), benzo[b]fluoranthene (BbF), benzo[k]fluoranthene (BkF), benzo[a]pyrene (BaP), indeno[1,2,3-cd]pyrene (IcdP), dibenz[a,h]anthracene (DahA) and benzo[ghi]perylene (BghiP); Hopane and sterane: ABB-20R-C27-Cholestane (ABB), AAA-20S-C27-Cholestane (AAA), 17A(H)-22,29,30-Trisnorhopane (Tm), 17A(H)-21B(H)-30-Norhopane (30AB), ~~and~~ 17A(H)-21B(H)-Hopane (29AB).

## 2.4. Data processing

### 2.4.1 Fuel-based emission factors

Fuel-based emission factors were calculated ~~by using~~ the carbon-mass balance formula:

$$EF_i = \frac{\Delta X_i}{\Delta CO_2} \cdot \frac{M_i}{M_{CO_2}} \cdot EF_{CO_2} \quad (1)$$

~~Where-where~~  $EF_i$  and  $EF_{CO_2}$  (g kg<sup>-1</sup> fuel) are the emission factors for species  $i$  and CO<sub>2</sub>, ~~respectively~~,  $\Delta X_i$  and  $\Delta CO_2$  (mol m<sup>-3</sup>) are the background-corrected concentrations of ~~species~~  $i$  and CO<sub>2</sub>, ~~respectively~~, and  $M_i$  and  $M_{CO_2}$  (g mol<sup>-1</sup>) represent the molecular weights of species  $i$  and CO<sub>2</sub>, ~~respectively~~.

The CO<sub>2</sub> emission factors ( $EF_{CO_2}$ ) were calculated as:

$$EF_{CO_2} = R_{FG} \cdot c(CO_2) \cdot M_{CO_2} \quad (2)$$

~~Where-where~~  $c(CO_2)$  (mol m<sup>-3</sup>) is the molar concentration of CO<sub>2</sub>, ~~and~~  $R_{FG}$  (m<sup>3</sup> kg<sup>-1</sup> fuel) represents the flue gas emission rate.

The flue gas emissions were calculated as:

$$R_{FG} = \frac{C_F}{c(CO) + c(CO_2) + c(C_{PM})} \quad (3)$$

~~Where-where~~  $C_F$  (g C kg<sup>-1</sup> fuel) represents the mass of carbon in 1 kg ~~of~~ diesel fuel,

and  $c(C_{CO})$ ,  $c(C_{CO_2})$ , and  $c(C_{PM})$  ( $g\ C\ m^{-3}$ ) represent the flue gas mass concentrations of carbon as CO, CO<sub>2</sub>, and PM, respectively in the flue gas, respectively.

#### 2.4.2 Average fuel-based emission factors for excavators and trucks

The average fuel-based emission factor for each excavator under in each relevant  
5 different operating operational modes was calculated by followsas:

$$EF_{i,j} = \sum EF_{i,j,g} \times P_{j,g} \quad (4)$$

Where-where  $EF_{i,j}$  ( $g\ kg^{-1}\ fuel$ ) is the average emission factor of species  $i$  for-from  
excavator  $j$ ,  $EF_{i,j,g}$  ( $g\ kg^{-1}\ fuel$ ) represents-is the emission factor of species  $i$  for-from  
excavator  $j$  under-in mode g-mode, and  $P_{j,g}$  (%) is the proportion of activity time (Fu  
10 et al., 2012) for excavator  $j$  in mode under-g-mode.

The average fuel-based emission factor for each truck under-in different driving conditions was calculated by followsas:

$$EF_{i,j} = \sum EF_{i,j,s} \times P_{j,s} \quad (5)$$

Where-where  $EF_{i,j}$  ( $g\ kg^{-1}\ fuel$ ) is the average emission factor of-for species  $i$  for-from  
15 excavator-truck  $j$ ,  $EF_{i,j,s}$  ( $g\ kg^{-1}\ fuel$ ) represents-is the emission factor of species  $i$  for  
excavator-truck  $j$  under-in driving condition s-condition, and  $P_{j,s}$  (%) is the proportion  
of activity time for truck  $j$  under-in driving condition s-condition.

#### 2.4.3 Benzo[a]pyrene equivalent concentration (BaP<sub>eq</sub>)

The various PAHs have a wide range of carcinogenic risks. Therefore, it is not  
20 accurate to evaluate the harmful effects of PAHs on human health using the total  
combined mass concentration. BaP<sub>eq</sub> is typically used to evaluate the carcinogenic  
risks associated with individual PAH (Mirante et al., 2013). The BaP<sub>eq</sub> was calculated  
as:

$$BaP_{eq} = \sum PAH_i \times PEF \quad (6)$$

25 where  $PAH_i$  is the measured concentration of an individual PAH for excavator  $i$ , and  
PEF is Because of different carcinogenic risks for each PAH, the BaP<sub>eq</sub> for parent  
PAHs were given. The BaP<sub>eq</sub> was calculated by multiplication of the measured  
concentrations by the respective-the potency equivalent-equivalence factor (PEF)

(Mirante et al., 2013). The PEF values were for that PAH obtained from Wang et al. (2008).

### 3. Results and discussion

#### 3.1 ~~Particulate matter~~ fuel-based emission factors of PM for in excavator exhausts

The  $EF_{PM}$  values for excavators exhaust ~~are are presented illustrated~~ in Figure 3, with ~~the~~ detailed information ~~shown given~~ in Table S4S5. The maximum fuel-based PM ~~fuel-based~~ emission factor was ~~almost~~ 37 times higher than the minimum ~~under different operating modes for different vehicles~~. In general, the average  $EF_{PM}$  for different excavators ranged from 96.5 to 2323  $mg\ kg^{-1}$  fuel, with an average of  $829 \pm 806\ mg\ kg^{-1}$  fuel. The  $EF_{PM}$  values of excavators reported by Fu et al. (2012) were within the range of  $EF_{PM}$  in this study ~~but in a narrower range~~. The ~~reason for the more widely range in~~  $EF_{PM}$  ~~values in this study here may could be that the be due to the difference in the~~ selection of excavators emission standards. The excavators selected by Fu et al. (2012) ~~included stage 1 and stage 2 emission standards, while this our study tested excavators with pre-stage 1 and stage 2 emission standards. Therefore, the range of  $EF_{PM}$  in this study may reflect the general excavator's PM emission situation in China.~~

$EF_{PM}$  ~~could be is~~ affected by many factors. In this study, the  $EF_{PM}$  range for excavators with different power ratings was 96.5 (35 kw) to 2323 (110 kw)  $mg\ kg^{-1}$  fuel, but the correlations between  $EF_{PM}$  and engine power (See Figure S5) were weak. Conversely, fuel quality, emission standard and operational mode significantly affected the  $EF_{PM}$ . Some variation characteristics about the  $EF_{PM}$  values due to the different fuel quality, emission standards and operating modes were summarized as follows. Firstly, ~~fuel~~ fuel quality ~~has had a great large~~ impact on  $EF_{PM}$  for ~~the~~ excavators. As shown ~~from in~~ Figure 3, a high-significant correlation ( $R^2 = 0.79$ ,  $P < 0.01$ ) was found between the average emission factors for excavators and the fuel sulfur contents ~~in fuel~~, which ~~is is~~ consistent with ~~the results studied from reported by~~ Yu et al. (2007).

The Secondly,  $EF_{PM}$  also decreased with stricter enhancing of emission standards for ~~the~~ excavators. The  $EF_{PM}$  measured  $EF_{PM}$  for pre-stage 1 excavators ~~under during~~

idling, moving and working ~~conditions~~ were  $914 \pm 393$  ~~mg kg<sup>-1</sup> fuel~~,  $609 \pm 38$  ~~mg kg<sup>-1</sup> fuel~~ and  $1258 \pm 1295$  mg kg<sup>-1</sup> fuel, respectively. ~~whereas. The EF<sub>PM</sub> for stage 2 excavators under idling, moving and working conditions for stage 2, they~~ were  $243 \pm 236$  ~~mg kg<sup>-1</sup> fuel~~,  $165 \pm 144$  ~~mg kg<sup>-1</sup> fuel~~ and  $551 \pm 587$  mg kg<sup>-1</sup> fuel, respectively.

5 Compared to pre-stage 1, The EF<sub>PM</sub> of the stage 2 excavators ~~were~~ reduced ~~by~~ 73%, 73% and 56% ~~in from the pre-stage 1 values under~~ idling, moving and working modes, respectively. The average EF<sub>PM</sub> for excavators of different emission standards decreased ~~by~~ 58% from pre-stage 1 to stage 2, suggesting the effectiveness of ~~the~~ emissions control policy.

10 ~~Lastly, The~~ EF<sub>PM</sub> varied sharply between different ~~operating operational~~ modes for ~~the~~ various excavators. Specifically, ~~excavators under working excavators modes have~~ ~~had~~ the highest EF<sub>PM</sub>, which ~~is was higher more~~ than ~~double~~ the values for ~~other operating modes idling and moving excavators by more than 1 fold~~. The average EF<sub>PM</sub> for excavators ~~under different driving conditions~~ were  $578 \pm 467$  ~~mg kg<sup>-1</sup> fuel (while~~ idling),  $343 \pm 264$  ~~mg kg<sup>-1</sup> fuel while (moving)~~ and  $904 \pm 979$  mg kg<sup>-1</sup> fuel ~~while (working), respectively. The Working mode produced the~~ highest average EF<sub>PM</sub>, ~~which under working mode~~ might be ~~because the attributed to~~ higher engine load, ~~which causes caused a~~ lower air-fuel ratios and ~~thus then~~ prompted ~~the~~ PM production.

### 20 3.2 Particulate matter ffueled-based emission factors ~~of PM~~ for trucks

The EF<sub>PM</sub> for all measured trucks ~~under different driving patterns~~ varied from  $176$  ~~mg kg<sup>-1</sup> fuel~~ to  $951$  mg kg<sup>-1</sup> fuel. ~~The maximum EF<sub>PM</sub> for trucks was three times more than the minimum. There were just tripled in PM emission factors for trucks from maximum to minimum.~~ The average EF<sub>PM</sub> for ~~the~~ tested diesel trucks was  $498 \pm 234$  mg kg<sup>-1</sup> fuel. In comparison, Wu et al. (2016) reported an average EF<sub>PM</sub> for diesel trucks of  $427$  ~~(95.6-1147 mg kg<sup>-1</sup> fuel)~~ mg kg<sup>-1</sup> fuel ~~(95.6-1147 mg kg<sup>-1</sup> fuel) and it is, which was within similar the same to the range foras~~ our results.

~~Besides, The~~ The average EF<sub>PM</sub> of diesel trucks ~~for with~~ different emission standards ~~and~~ vehicle sizes ~~and while using different~~ driving patterns were provided

30 under real-world conditions (Figure 4). The measured EF<sub>PM</sub> for China II, China III,

and China IV diesel trucks varied from 200 ~~mg kg<sup>-1</sup> fuel~~ to 548 mg kg<sup>-1</sup> fuel. The EF<sub>PM</sub> for the China II truck measured in this study was lower than ~~the results obtained from reported by~~ Liu et al. (910-2100 ~~mg kg<sup>-1</sup> fuel~~) (2009) (910-2100 mg kg<sup>-1</sup> fuel). The average EF<sub>PM</sub> for light-duty, medium-duty and heavy-duty diesel trucks were 524 ± 457 ~~mg kg<sup>-1</sup> fuel~~, 459 ~~mg kg<sup>-1</sup> fuel~~ and 492 mg kg<sup>-1</sup> fuel, respectively. The average EF<sub>PM</sub> ~~of for~~ trucks under non-highway and highway driving patterns were 548 ± 311 ~~mg kg<sup>-1</sup> fuel~~ and 497 ± 231 mg kg<sup>-1</sup> fuel, respectively. As ~~shown in~~ Figure 4 ~~shows~~, reductions ~~of in the measured~~ EF<sub>PM</sub> ~~between the for~~ China II ~~truck to and~~ China IV trucks ~~and from between the~~ China III ~~truck to and~~ China IV trucks ~~in EF<sub>PM</sub>~~ were 63.53.5% and 65.65.6%, ~~which indicated~~ ~~indicating~~ that improvements ~~of in the~~ emission standards for diesel trucks ~~significantly decreased~~ ~~could significantly reduce~~ PM emissions. ~~It should be noticed~~ ~~Of particular note was~~ that the EF<sub>PM</sub> for China III and light-duty diesel trucks were higher than ~~the values for the~~ other corresponding trucks. The reason ~~may might~~ be ~~attributed to a result of~~ poor driving conditions, ~~that include i.e.,~~ low average speed and ~~more volatile~~ ~~highly varied speed in speed for those trucks~~ (Figures S2-S3 and Figure S3S4). ~~The Same same~~ tendency ~~is apparent in~~ ~~could be seen from~~ Figure 4, ~~that with~~ diesel trucks ~~emitted~~ ~~emitting~~ more PM ~~while driving on the under~~ non-highway ~~condition~~ (average speed ~~of~~ 28.5 km h<sup>-1</sup>) than ~~while driving on the those under~~ highway ~~condition~~ (average speed ~~of~~ 60.7 km h<sup>-1</sup>). ~~Furthermore, the~~ The road grade ~~further was an another aspect effected~~ ~~affected~~ the EF<sub>PM</sub> of the on-road diesel trucks. For example, the EF<sub>PM</sub> for T5 ~~under driving on the~~ highway ~~road~~ was lower than those for T1 ~~driving on the highway~~, because of ~~bigger lower~~ road grade for T5 ~~under highway road than those for T1~~ (Figure S3S4).

### 3.3 Particulate matter composition for individual diesel vehicles

Four ~~types of~~ constituents were considered for reconstituting PM mass, in this study: (1) organic matter, which was estimated by multiplying the corrected OC ~~by by~~ a factor of 1.6 (Almeida et al., 2006); (2) EC; (3) ~~water soluble ions~~ WSIs; and (4) elements. The reconstituted masses for ~~each the~~ excavator samplers ~~was were~~ 74.7-123% of the measured mass, while the reconstituted masses for the diesel truck ~~sampler samples was were~~ only 43.2-54.4% of the measured mass (Figure 5). ~~Except~~

~~for~~In addition to uncalculated components, this discrepancy ~~may-might~~ be attributed to ~~uncertainties in the weighing process due to a distribution error from OC and EC, moisture effects, or metal oxidation~~ (Dai et al., 2015).

### 3.3.1 Particulate matter composition for individual excavator

The chemical composition of PM for each excavator ~~was-is~~ shown in Figure 5 and Table ~~S2S6~~. For each excavator, ~~the~~ carbonaceous component (OM+EC) was the dominant species, ~~which is consisted-consistent~~ with ~~results from a~~ previous study by Liu et al. (2005)~~from a non-road diesel generator that had found-, who reported that~~ the proportions of ~~organic and element carbon~~OC and EC in PM ranged from 70.2% to 90.61% (Liu et al., 2005). ~~BBecause-ecause the~~ OC/EC ratio is also used to identify the source of atmospheric particulate pollution, ~~deeper-further assessment was performed on the discussion about~~ OC/EC ratios ~~under-in~~ different ~~operating operational~~ modes for each excavator ~~was-conducted~~ (Figure 6). The average OC/EC ratios ~~for-during~~ idling, moving, and working ~~modes~~ were 1.57, 0.57, and 2.38, respectively. The OC/EC ratio ~~under-during~~ idling was ~~higher-greater~~ than 1 because soot ~~hardly~~ generated at low temperatures ~~-hardly~~ and fuel-rich zone. ~~These results were consistent those in -, which is similar to the research done by~~ Liu et al. (2005). Furthermore, Liu et al. (2005) reported that the OC/EC ratios decreased with ~~an increasing-increase in the load for~~ non-road engines ~~load~~. However, this trend ~~was not couldn't be~~ observed in this study. The OC/EC ratio was 2.38 ~~under-while~~ working mode, ~~and increasing-increased again~~ with ~~load~~ increasing ~~load~~, which ~~was~~ consistent with the results ~~reported by-from~~ Zhang et al. (2014). ~~As shown in Figure 6, the differences between Large-OC/EC ratios differences-for excavators under-different excavator operating-operational~~ modes were ~~profoundseen in Figure 6, which may and could~~ be ~~eaused-affected~~ by a number of factors, ~~(such-asincluding~~ transient working conditions, diesel sulfur content, and extensive ~~OC~~ sources ~~for-OC~~) (Cocker et al., 2004, Liu et al., 2005, Ruiz et al., 2015).

As shown ~~from-in~~ Figure 5, ~~WISs-WSIs~~ and elements fractions ranged from 0.335% to 1.21% and from 0.163% to 7.50%, ~~respectively~~, for all excavators. The total ~~sum~~ proportion of ~~WISs-WSIs~~ and elements to PM was ~~the~~ highest in excavator E6,

followed by excavator E1. Generally, the total ~~sum~~ proportion of ~~WISs-WSIs~~ and elements to PM in exhaust from excavator ~~E1-E6~~ was 4 to 14 times higher than the corresponding proportions in exhaust from the other excavators. Sulfate and nitrate were the main ~~WISs-WSIs~~ (79.1%-90.0% of ~~WISsWSIs~~) for almost all of the excavators, except for E1, in which ~~while~~ the proportion of Cl<sup>-</sup> ~~of WISs for excavator E1~~ (67.2%) was the highest (Table ~~S2S6~~). Fe, Ca, Na, Mg, and K were relatively dominant ~~in~~ elements, ~~but except~~ for E4 ~~excavator~~, Fe, Zn, and Cu were the most abundant elements. Wang et al. (2003) reported that the concentrations of the crustal elements Fe, Ca, and Mg that account for 50% of the total elements in diesel fuel were significantly higher than anthropogenic elements emitted from diesel vehicle engines, which is consistent with the results from our study. Similarly, diesel was the dominant source for these elements because the sampling tube was placed directly on the tailpipe. It may be attributed to that Zn is known from oil additives and Cu usually emitted from wear debris (Lin et al., 2015, Wu et al., 2015). Table 1 and Table 2 showed that excavator E4 produced in 2004 and the diesel quality used was poor, resulting in high Zn and Cu emission. The abundance of Fe, Zn, and Cu in the exhaust of E4 could have been affected by E4 being used to transport ironstone. Besides In addition, the elements fractions for the two excavators ~~produced-manufactured~~ in 2013 (~~E1~~ (1.42% for E1), ~~-and-~~ ~~E6~~ (7.50% for E6) and 5.66 mg kg<sup>-1</sup> for E1 + E6) were higher than those for the other excavators (a total of 4.02 mg kg<sup>-1</sup> for E2, E3, E4, and E5), ~~which may~~. This indicates that elements emissions ~~was-were~~ deteriorating and more stringent control technology should be developed to avoid ~~the total elements~~ adverse health effects from the total elements composition of PM in the exhaust.

~~In addition,~~ The n-alkanes, PAHs, hopane and steranes fractions in exhaust from the excavators were ~~ranged from~~ 3.6% to 9.6%, ~~from~~ 0.03% to 0.24%, and ~~from~~ 0.001% to 0.09% ~~for excavators~~, respectively. Liang et al. (2005) characterized diesel particulate matter emitted from non-road engines using a dynamometer test and found that n-alkanes accounted for 0.83% of PM, which was lower than the proportion found in results obtained from this study, ~~The main reasons are the possibly because they used~~ low sulfur diesel fuel and different sampling methods used in Liang's study

and different methods used in obtained the PM. Contrary In contrast to what was observed the fractions for of WISs-WSIs and elements, Figure 5 showed that the fractions of n-alkanes, hopane and steranes fractions were the highest in excavator E4, while the fractions of PAHs fraction was the highest in for the exhaust from excavator E3. In a comparison of the fuel quality between E3 and E4, E4 had poorer diesel quality, which might be the reason for high n-alkane, hopane and steranes concentrations. Similarly, It was said by Rogge et al. (1993) found that n-alkanes, PAHs, hopane and steranes are were mostly derived from the incomplete combustion of fuel and lubricant oil. By comparing the differences between fuel quality and performance of excavators, it could be deduced that n-alkanes, hopane and steranes were influenced by fuel quality and However, we speculated that PAHs was were affected by combustion conditions (i.e., combustion temperature) in this study, because E3, with the stage standard, had better performance and superior fuel quality. PAHs-isomer ratios have have been widely used to distinguish conduct the source apportionment in for environmental receptors (such as sediments) (Liu et al., 2012). Yunker et al. (2002) found that the ratios of the principal masses of PAH 178, 202, 228 and 276 parent PAHs have had a the best potential to distinguish between natural and anthropogenic sources. For the excavators, the ratios ranges of ratios offor BaA/(BaA+Chry), IcdP/(IcdP+BghiP), and Flua/(Flua+Pry) were 0.26-0.86, 0.20-1.0, and 0.24-0.87, respectively, with averages of  $0.47 \pm 0.27$ ,  $0.44 \pm 0.38$ , and  $0.48 \pm 0.27$ , respectively (Figure 7). The average ratios of PAHs for in excavator exhausts obtained in this study were similar with to that those from Liu et al. (2015) reported for non-road diesel engines. The E4 excavators had a clear showed an obvious difference in the ratios of BaA/(BaA+Chry), IcdP/(IcdP+BghiP), and Flua/(Flua+Pry) to those from between the other excavators tested in this study. The isomer ratios of BaA/(BaA+Chry), IcdP/(IcdP+BghiP) and Flua/(Flua+Pry) for E4 were 0.86, 1.0 and 0.87, respectively, and it were. These were different with from the ranges for fuel combustion defined by Yunkers et al. (2002). The ratios of PAHs emitted from diesel vehicles reported by Yunkers et al. (2002) mainly refered to those from on-road diesel vehicles. However, the operating operational modes and fuel quality

for non-road diesel vehicles ~~are~~are more complicated than those ~~from~~for on-road diesel vehicles. Therefore, ~~the results~~ in this study ~~could give~~provides references values for the isomer ratios of PAHs ~~for in~~ non-road diesel vehicle exhausts.

### 3.3.2 Particulate matter composition for individual diesel trucks

For diesel trucks, the total carbonaceous composition (OM+EC) ~~were~~ accounted for 44.0% (~~T~~E1), 27.9% (~~E~~T2), 43.9% (~~E~~T3), 51.6% (~~E~~T4) and 46.3% (~~E~~T5) of PM, which ~~is~~are all lower than ~~those the values~~ reported in previous studies (Chow et al., 2011, Wu et al., 2015) because of. ~~The reason may be mainly attributed to was~~ the different OC and EC detection methods used in our study ~~for organic carbon and elements carbon~~. Cheng et al. (2011) collected 333 PM<sub>2.5</sub> samples and analyzed OC and EC by two common thermal-optical methods (NIOSH and IMPROVE). ~~They and~~ found that NIOSH-defined EC was lower (up to 80%) than that defined by IMPROVE. The IMPROVE thermal-optical method was used in this study ~~was IMPROVE~~, which would cause under valuation ~~make content~~ of OC ~~under evaluated~~. Except for the T2 and T4 trucks, Almost almost all of the OC/EC ratios for diesel trucks ~~under different driving conditions~~ calculated in this study were lower than 1, which ~~was~~is consistent with ~~the~~ conclusions from previous studies (Figure 6), ~~except for the T2 and T4 trucks~~. The OC/EC ratios for T2 ~~under during~~ highway and non-highway driving ~~conditions~~ were 5.64 and 15.5, respectively. ~~This result may be attributed to which may be a result of the China IV emission standard for T2 (China IV)~~. Alves et al. (2015b) reported that modern diesel passenger cars (Euro 4 and Euro 5) exhibit have high OC/EC ratios. As shown in Figure S3, the driving speed for T4 was zero for the first 500 seconds. Cheng et al. (2015) reported that the OC/EC ratios were substantially above 1 while idling or with low load. Furthermore ~~Therefore, the~~ OC/EC ratio for T4 while driving on the ~~under~~ non-highway ~~condition~~ was 4.10, which ~~may might be have been~~ caused by the low driving speed. ~~Cheng et al. (2015) reported that the OC/EC ratios were substantially above unity at idling and low load. As shown from Figure S2, the driving speed for T4 was zero in 500 seconds before driving.~~

The Sum sum of WISs ~~WSIs~~ and elements fractions were lower than 5% for the

exhaust from ~~almost~~ all of the diesel trucks, except for ~~that from~~ T2 ~~truck~~, which is consistent with the results ~~gained from~~ Zhang et al. (2015a).  $\text{SO}_4^{2-}$  was the most abundant ions for trucks T2 and T5, while  $\text{NO}_3^-$  was the most abundant ions for trucks T1, T3 and T4. For T2 ~~diesel truck~~, ~~WISs-WSIs~~ (13.8%) ~~was-were~~ the most significant component of  $\text{PM}_{10}$  ~~after followed by~~  $\text{OC}_1$  ~~and which it was higher by a factor of~~ 4 to 10 ~~times higher~~ than ~~it was for the those in~~ other trucks (Table ~~S2S6~~). T2 ~~truck is was~~ a China IV diesel vehicle ~~and with~~ well-controlled combustion conditions ~~caused-leading to~~ more water emissions, which accelerates the ~~translation transformation~~ from the gas phase to ~~WISs-WSIs~~ (such as e.g.,  $\text{SO}_2$  ~~translate-the transformation of~~  $\text{SO}_2$  to  $\text{SO}_4^{2-}$ ). As ~~we can see- be seen from in~~ Table ~~S2S6~~, Fe was the most abundant element for trucks T1, ~~T3~~ and T5, while Ca was ~~the most abundant the most abundant element~~ for trucks ~~T1T2~~, T3, and T4. ~~The total element fraction of T2 (China IV) was 16 times higher than that of T1 exhaust (China III) Compared with elements fractions in T2 (China IV) and T1 (China III) trucks, fractions changed from 0.09% (T2) to 1.5% (T1).~~ Although the ~~PM emission factors~~  $\text{EF}_{\text{PM}}$  for diesel trucks decreased with stricter emission standards, the ~~WISs-WSIs~~ and elements contents ~~increasing-increased along with promoting the emission standards for diesel trucks. In consideration of~~ Because acid rain ~~is causing-caused~~ by sulfate and nitrate and adverse health effects are caused by elements, ~~great-attention should-needs to~~ be ~~pay-paid~~ to this phenomenon.

The n-alkanes, PAHs, hopane and steranes fractions ~~ranged from-were~~ 0.85% ~~-to~~ 4.78%, ~~from-0.01% to-0.54%~~ and ~~from-0.002% to-0.024%~~, for ~~the~~ trucks, ~~respectively~~. As shown in Table ~~S2S6~~, C20 was the most abundant ~~species-in~~ n-alkanes ~~for truck in exhaust from~~ T1, T2 and T4, while C19 was the most abundant ~~n-alkane in exhaust from species for truck~~ T3 and T5. ~~For-Of the~~ PAHs, the most ~~notable-abundant~~ species was ~~Pyrene-pyrene~~, which ~~was-substantially higher than all other-PAHs for all trucks. The proportions of n~~ N-alkanes, PAHs, hopane and steranes ~~accounted for the highest proportions to-of~~ PM ~~were-highest~~ for ~~the exhaust from truck-T3, which-and may-might~~ be affected by many factors, ~~such-as-including~~ differences in the engine ~~rate-power~~ rating, complex reactions in the engine

(combustion process and pyrolysis reactions related to temperature, humidity, etc.), and driving conditions. As shown ~~from-in~~ Figure 7, ~~scatters-of-the~~ isomer ratios for diesel trucks ~~were-covered-from~~ were 0.28 ~~to~~ –0.35 for BaA/(BaA+Chry), ~~from~~ 0.08 ~~to~~ –0.22 for IcdP/(IcdP+BghiP) and ~~from~~ 0.08 ~~to~~ –0.39 for Flu~~as~~/(Flua+Pry), with averages of  $0.31 \pm 0.03$ ,  $0.15 \pm 0.06$  and  $0.23 \pm 0.12$ , respectively. ~~There-These were~~ are similar to ~~the~~ results ~~from-reported by~~ Schauer et al. (1999).

### 3.4 Average chemical constituent composition of PM emitted from diesel vehicles

#### 3.4.1 Average chemical composition ~~constituent~~ of PM ~~for-in~~ excavator exhausts

The average PM chemical ~~component compositions of PM~~ for excavator exhausts ~~was-are~~ listed in Table 3. ~~It appeared that e~~Carbonaceous matter was the dominant component and accounted ed for 72.5% of the PM for excavators, whereas OC was the most abundant species (39.2%) for PM. ~~Total-The total~~ element fraction was the second largest group and contributed 1.76% of PM. ~~For-Of the~~ elements, ~~the~~ emissions ~~was-were obviously~~ dominated by Fe at which accounted for 46.3% ~~of the elements~~. In addition, ~~Table 3 showed that~~ the proportion of n-alkanes in PM ~~for-from~~ excavator exhausts (5.14%) was higher than the proportions of the ~~those for~~ other organic matter types (PAHs were  $\div 0.098\%$  while  $\div$  hopane and sterane were  $\div 0.026\%$ ); and C20 ~~and-/~~ C19 were was the most abundant maximum carbon in n-alkanes. For ~~the~~ parent PAHs, ~~the~~ emissions were dominated by Pry and Fluo, followed by Nap and Chry.

~~To compare our results with other studies,~~ Table 3 summarizes the average source profiles of PM ~~for-in~~ excavator exhaust as derived in this study, as well as ~~those ones~~ previously reported by others for comparison. As shown in Table 3, the average fraction of total carbonaceous components for the excavators tested in this study ~~are~~ was consistent with ~~those for a measured from~~ marine engine, while the element fraction ~~of elements~~ was lower than that for a marine engine (Sippula et al., 2014). Iron oxide is recognized as a catalyst and can promote soot burnout during combustion processes (Kasper et al., 1999). ~~It is said that oxidation of soot was enhanced during increasing of transition metals for diesel engines (Kasper et al., 1999).~~ The EC fraction of PM in the PM ~~for~~ excavator exhausts was higher than that

~~those from reported by~~ Sippula et al. (2014), which ~~may might be attributed be the~~ result of a ~~to~~ lower metal fraction in ~~the~~ excavators ~~used for their study~~. Comparing results from this study with other references showed that ~~t~~The proportions of n-alkanes measured in this study ~~is-were~~ significantly higher than those emitted from a marine engine (4-fold) and non-road generators (6-fold) ~~in another study (Liang et al., 2005).~~ (Liang et al., 2005), which could be the result of ~~The reason may be attributed to different contents of~~ aliphatic compounds ~~existing~~ in ~~the~~ diesel fuels ~~s-used~~ for those non-road vehicles (Sippula et al., 2014). For the marine engine and non-road generators, C22 and C17 were the most abundant ~~n-alkane species.~~ ~~in n-alkanes,~~ respectively. PAHs ~~emission-waswere~~ dominated by Phe for a marine engine and Fluo for non-generators, which was different ~~with-from~~ the result obtained ~~from-for~~ ~~the~~ excavators. This could indicate that the PM emitted from different types of non-road diesel vehicles has ~~various-varying~~ source profiles ~~because-of-based on the~~ ~~diverse~~ operational conditions.

#### 3.4.2 Average source profile of PM for trucks

As shown in Table 3, ~~average-emission-of~~ PM from trucks was dominated by carbonaceous ~~matter~~ (36.8%), ~~and~~ followed by ~~WISs-WSIs~~ (4.67%) and elements (0.941%). For individual species, sulfate and nitrate were the most abundant ~~in-water~~ ~~soluble ions~~ ~~WSIs~~, and Fe was ~~the most abundant dominated in~~ elements. Moreover, for organic matters, the average proportions of n-alkanes, PAHs, hopanes and steranes ~~was-were~~ 1.73%, 0.130%, and 0.011%, respectively. C20 was ~~the maximum-most~~ ~~abundant carbon in~~ n-alkanes, and the ~~emission-of~~ PAHs ~~was-were~~ dominated by Phe.

In comparison, ~~emission-of~~ total carbon ~~emissions from-in~~ this study ~~was-were~~ lower than ~~those in~~ previous studies, whereas, ~~the~~ ~~WISs-WSIs~~ and elements fractions were ~~relatively higher than results obtained from other research groups~~ (Alves et al., 2015a, Cui et al., 2016, Schauer et al., 1999, Wu et al., 2016). ~~There are s~~Several reasons ~~factors~~ could ~~have influenced these differing be used to explain the~~ results, including fuel quality, driving condition, ~~parameters-of~~ engine ~~parameterss~~ (fuel injection timing, compression ratio, ~~and~~ fuel injector design) and experimental methods (Sarvi et al., 2008a, Sarvi et al., 2008b, Sarvi et al., 2009, Sarvi et al., 2010).

As shown in Table 3, Fe was ~~the~~ dominant ~~in elements from in results measured~~ ~~by studies using~~ on-road tests and tunnels, which ~~was is~~ similar ~~with to~~ our results, while Zn and Na were dominant in elements from results obtained by ~~a~~ dynamometer. Therefore, ~~the results obtained from real world (on-road tests and tunnels) were~~ ~~different from those obtained in a laboratory. on-road test and tunnels measured in~~ ~~real world would reflect real PM emission better.~~ For organic matters, the proportion of PAHs, hopane and sterane to PM were consistent with the results from Schauer et al. (1999) and Cui et al. (2016). ~~Similar with~~ ~~As in~~ this study, the ~~maximum carbon~~ ~~most abundant~~ in n-alkanes was C20 ~~as~~ measured by Schauer et al. (1999), and Pyr was ~~the~~ most abundant ~~species in~~ PAHs reported by Cui et al. (2016). Thus, ~~the~~ average profile of PM for on-road diesel trucks ~~was is~~ relatively stable ~~and consistent~~ ~~across studies.~~

### 3.5 ~~Comparing average s~~Source profiles ~~comparison from for~~ excavators ~~with those from and~~ trucks

~~Compared with the average EF<sub>PM</sub> of excavators and diesel trucks obtained in this study, a~~verage EF<sub>PM</sub> for excavators ( $836 \pm 801$  mg kg<sup>-1</sup> fuel) was higher than ~~those that~~ for diesel trucks ( $498 \pm 234$  mg kg<sup>-1</sup> fuel). ~~The This~~ result ~~was is~~ understandable because ~~state the~~ operations for excavators ~~were are~~ more transient than those for trucks. Sarvi et al. (2010) reported that particulate matter ~~emission~~ ~~emitted~~ from diesel engines was typically low during steady state operation. Although ~~the~~ average EF<sub>PM</sub> of excavators ~~was~~ higher than that ~~emitted from of~~ trucks, ~~the~~ average EF<sub>PM</sub> of ~~the~~ stage 2 excavator~~s~~ was  $477$  mg kg<sup>-1</sup> fuel, which was lower than ~~those for the that emitted by~~ China II and China III trucks. Thus, appropriate regulations formulated for non-road diesel vehicles could improve the ~~ir~~ PM emissions ~~situation.~~

When we compared the average percentages of chemical components in PM for excavators with those for trucks, ~~we found that there were some several~~ differences ~~were found between excavators and trucks.~~ In general, ~~the~~ carbonaceous ~~composition~~ (95.9%) and elements (1.76%) fractions for excavators were higher than those for diesel trucks (42.8% ~~for carbonaceous composition~~ and 0.94% ~~for~~

elements respectively). As shown in Figure 8, ~~the~~ the structures of different ring PAHs in the exhaust from excavators and trucks varied sharply, especially for 5 and 6-ring PAHs. BaP<sub>eq</sub> levels for excavators and trucks were absolutely difference, although the average percentage of total PAHs ~~average percentages of in the~~ PM were consistent between ~~the~~ excavators and trucks. ~~Almost all of the parent PAHs's BaP<sub>eq</sub> calculated in this study for trucks and excavators were higher than the datum from WHO that concentration caused 1/10000 risk of carcinogenic.~~ Due to their lipophilicity, high molecular weight (5+6 ring) PAHs are considered to be more harmful to human health than the other PAHs. For further distinction, BaP<sub>eq</sub> was used in this study. The range of total BaP<sub>eq</sub> for trucks was 5.32 (T5) to 155 (T3) ng m<sup>-3</sup>, while for excavators, the range of total BaP<sub>eq</sub> was 38.3 (E1) to 3637 (E4) ng m<sup>-3</sup>. Moreover, ~~the~~ total average of BaP<sub>eq</sub> for ~~the~~ excavators was 31 fold-times larger than that of those for ~~the~~ diesel trucks. ~~Almost all of the parent PAHs's BaP<sub>eq</sub> values calculated in this study for trucks and excavators were higher than the datum concentrations from WHO that concentration caused 1/10000 of the risk of carcinogenic risk,~~ according to the World Health Organization (WHO). Due to ~~the some~~ adverse environmental effects and health hazards ~~caused by for~~ carbonaceous composition, elements, and PAHs, the PM emissions from excavators ~~require urgent should be controlled urgently.~~

## Conclusions

This study report~~eds~~ the characteristics of PM source profiles for excavators and ~~the EF<sub>PM</sub> trucks.~~ Above all, PM emission factors ~~values for exhaust emitted from excavators and trucks with different emission standards and used under in different operating operational modes, emission standards and/or~~ road conditions were obtained. ~~The The~~ EF<sub>PM</sub> for different excavators ranged from 96.5 to 2323 mg kg<sup>-1</sup> fuel, with an average of 810 mg kg<sup>-1</sup> fuel and ~~showed~~ a high correlation ( $R^2=0.79$ ,  $P<0.01$ ) with the ~~fuel~~ sulfur contents ~~in the fuel~~. The highest average EF<sub>PM</sub> ~~for excavators that are in~~ working ~~mode~~ (904 ± 979 mg kg<sup>-1</sup> fuel) might be ~~attributed to the result of~~ higher engine load, ~~which caused causing~~ lower air-fuel ratios. The average EF<sub>PM</sub> for ~~the~~ tested diesel trucks ~~of with~~ different emission standards and vehicle sizes under different driving conditions was 498 ± 234 mg kg<sup>-1</sup> fuel. The average EF<sub>PM</sub> for

excavators with different emission standards ~~excavators~~ decreased by 58% from pre-stage 1 to stage 2. Moreover, ~~the~~ reductions in  $EF_{PM}$  from ~~the~~ China II ~~truck~~ to ~~the~~ China IV truck and from ~~the~~ China III ~~truck~~ to ~~the~~ China IV truck in  $EF_{PM}$  were 63.5% and 65.6%, respectively. ~~Those indicate~~ indicating that improvements ~~of to the~~ emission standards for diesel trucks and excavators have significantly decreased PM emissions significantly. It should be noticed that ~~the~~  $EF_{PM}$  for China III and light-duty diesel trucks were higher than those for ~~the~~ other ~~corresponding~~ trucks, ~~which The could be a result of reasons may be attributed to~~ poor driving conditions that included a low average and highly variable speed ~~and more volatile in speed for those trucks~~. For each excavator, ~~the~~ carbon component (OM+EC) was ~~the~~ dominant species fraction and accounted for approximately 74.1-123% of ~~the~~ PM. The average ranges of ~~WSIs~~ WSIs, elements, n-alkanes, PAHs, hopane and sterane fractions for each excavator were 0.335%-1.21%, 0.163%-7.50%, 3.6%-9.6%, 0.03%-0.24% and 0.001%-0.09%, respectively. In contrast to ~~the~~ other excavators, Zn and Cu were the second and third most abundant elements in ~~excavators exhaust from~~ E4, which ~~may might be attributed to the result of~~ poor fuel quality and the ~~old vehicles vehicle~~ age. ~~Besides~~ Additionally, the elements fractions for ~~the~~ two excavators produced in 2013 (E1 (1.42%) and E6 (7.50%)) were higher than other excavators, which ~~may might~~ indicate that elements emissions control was deteriorating deteriorated and more stringent control technology should be developed ~~to avoid the total elements adverse health effects~~. For excavators, the ranges of ~~the~~ ratios of BaA/(BaA+Chry), IcdP/(IcdP+BghiP) and Flua/(Flua+Pry) were 0.26-0.86, 0.20-1.0 and 0.24-0.87, respectively, with average of  $0.47 \pm 0.27$ ,  $0.44 \pm 0.38$  and  $0.48 \pm 0.27$ , respectively. For diesel trucks, ~~the~~ total carbonaceous composition (OM+EC) ~~were~~ accounted for 44.0% (~~E1T1~~), 27.9% (~~E2T2~~), 43.9% (~~E3T3~~), 51.6% (~~E4T4~~) and 46.3% (~~E5T5~~) of PM. For T2 ~~diesel truck~~, ~~WSIs~~ WSIs (13.8%) ~~was were~~ the most significant component fraction of PM after OC<sub>2</sub>, and it was higher than those ~~in for the~~ other trucks by, within a factor of 4 to 10. The n-alkanes, PAHs, hopane and steranes fractions ranged from 0.85% to 4.78%, ~~from~~ 0.01% to 0.54% and ~~from~~ 0.002% to 0.024% for trucks, respectively. In comparison with the results from other

~~literatures studies~~, the characteristics of the average source profiles for different types of non-road diesel vehicles varied sharply, while those for on-road diesel vehicles, ~~those characteristics~~ showed more stability. Although the PAHs fractions ~~of PAHs~~ for the excavators and trucks were ~~identical~~ similar, the total ~~of~~-BaP<sub>eq</sub> that was used to evaluate the carcinogenic risk was 31 times greater for excavators than fold of those for trucks.

Acknowledgements. This study was supported by the CAS Strategic Research Program (No.XDB05030303), the Natural Scientific Foundation of China (Nos.41273135 and 41473091), the Fundamental Research Funds for the Central Universities.

## Reference

- Adar, S.D., D'Souza, J., Sheppard, L., Kaufman, J.D., Hallstrand, T.S., Davey, M.E., Sullivan, J.R., Jahnke, J., Koenig, J., Larson, T.V., Liu, L.J.S.: Adopting Clean Fuels and Technologies on School Buses. Pollution and Health Impacts in Children, American Journal of Respiratory and Critical Care Medicine. 191(12): 1413-1421 2015
- Aggarwal, P., Jain, S.: Impact of air pollutants from surface transport sources on human health: A modeling and epidemiological approach, Environment International. 83: 146-157 2015
- Almeida, S.M., Pio, C.A., Freitas, M.C., Reis, M.A., Trancoso, M.A.: Approaching PM<sub>2.5</sub> and PM<sub>2.5-10</sub> source apportionment by mass balance analysis, principal component analysis and particle size distribution, Science of the Total Environment. 368(2-3): 663-674 2006
- Alves, C.A., Barbosa, C., Rocha, S., Calvo, A., Nunes, T., Cerqueira, M., Pio, C., Karanasiou, A., Querol, X.: Elements and polycyclic aromatic hydrocarbons in exhaust particles emitted by light-duty vehicles, Environmental Science and Pollution Research. 22(15): 11526-11542 2015a
- Alves, C.A., Lopes, D.J., Calvo, A.I., Evtyugina, M., Rocha, S., Nunes, T.: Emissions from Light-Duty Diesel and Gasoline In-Use Vehicles Measured on Chassis Dynamometer Test Cycles, Aerosol and Air Quality Research. 15(1): 99-116 2015b
- CCCMY (Compiling committee of China machinery industry yearbook), CCMA (China Construction Machinery Association): China construction machinery industry yearbook. China Machine Press Place, Published, 2013.
- Chen, F., Hu, W., Zhong, Q.: Emissions of particle-phase polycyclic aromatic

- hydrocarbons (PAHs) in the Fu Gui-shan Tunnel of Nanjing, China, *Atmospheric Research*. 124: 53-60 2013
- Cheng, M.T., Chen, H.J., Young, L.H., Yang, H.H., Tsai, Y.I., Wang, L.C., Lu, J.H., Chen, C.B.: Carbonaceous composition changes of heavy-duty diesel engine particles in relation to biodiesels, aftertreatments and engine loads, *Journal of Hazardous Materials*. 297: 234-240 2015
- Cheng, Y., Zheng, M., He, K.-b., Chen, Y., Yan, B., Russell, A.G., Shi, W., Jiao, Z., Sheng, G., Fu, J., Edgerton, E.S.: Comparison of two thermal-optical methods for the determination of organic carbon and elemental carbon: Results from the southeastern United States, *Atmospheric Environment*. 45(11): 1913-1918 2011
- Chow, J.C., Watson, J.G., Lowenthal, D.H., Antony Chen, L.W., Motallebi, N.: PM<sub>2.5</sub> source profiles for black and organic carbon emission inventories, *Atmospheric Environment*. 45(31): 5407-5414 2011
- Cocker, D.R., Shah, S.D., Johnson, K.C., Zhu, X.N., Miller, J.W., Norbeck, J.M.: Development and application of a mobile laboratory for measuring emissions from diesel engines. 2. Sampling for toxics and particulate matter, *Environmental Science & Technology*. 38(24): 6809-6816 2004
- Cui, M., Chen, Y., Tian, C., Zhang, F., Yan, C., Zheng, M.: Chemical composition of PM<sub>2.5</sub> from two tunnels with different vehicular fleet characteristics, *Science of The Total Environment*. 550: 123-132 2016
- Dai, S., Bi, X., Chan, L.Y., He, J., Wang, B., Wang, X., Peng, P., Sheng, G., Fu, J.: Chemical and stable carbon isotopic composition of PM<sub>2.5</sub> from on-road vehicle emissions in the PRD region and implications for vehicle emission control policy, *Atmospheric Chemistry and Physics*. 15(6): 3097-3108 2015
- Fu, M.L., Ge, Y.S., Tan, J.W., Zeng, T., Liang, B.: Characteristics of typical non-road machinery emissions in China by using portable emission measurement system, *Science of the Total Environment*. 437: 255-261 2012
- Huang, C., Chen, C.H., Li, L., Cheng, Z., Wang, H.L., Huang, H.Y., Streets, D.G., Wang, Y.J., Zhang, G.F., Chen, Y.R.: Emission inventory of anthropogenic air pollutants and VOC species in the Yangtze River Delta region, China, *Atmospheric Chemistry and Physics*. 11(9): 4105-4120 2011
- Huo, H., Yao, Z.L., Zhang, Y.Z., Shen, X.B., Zhang, Q., He, K.B.: On-board measurements of emissions from diesel trucks in five cities in China, *Atmospheric Environment*. 54: 159-167 2012
- IARC (International Agency for Research on Cancer): Diesel Engine Exhaust Carcinogenic, 2012.
- Kasper, M., Sattler, K., Siegmann, K., Matter, U., Siegmann, H.C.: The influence of fuel additives on the formation of carbon during combustion, *Journal of Aerosol Science*. 30(2): 217-225 1999
- Li, D.I., Wu, Y., Zhou, Y., Du, X., Fu, L.x.: Fuel Consumption and Emission Inventory of Typical Construction Equipments in China, *Huanjing Kexue*. 33(2): 518-524 2012
- Liang, F.Y., Lu, M.M., Keener, T.C., Liu, Z.F., Khang, S.J.: The organic composition of diesel particulate matter, diesel fuel and engine oil of a non-road diesel generator, *Journal of Environmental Monitoring*. 7(10): 983-988 2005

- Lin, Y.C., Tsai, C.J., Wu, Y.C., Zhang, R., Chi, K.H., Huang, Y.T., Lin, S.H., Hsu, S.C.: Characteristics of trace metals in traffic-derived particles in Hsuehshan Tunnel, Taiwan: size distribution, potential source, and fingerprinting metal ratio, *Atmospheric Chemistry and Physics*. 15(8): 4117-4130 2015
- 5 Liu, H., He, K.B., Lents, J.M., Wang, Q.D., Tolvet, S.: Characteristics of Diesel Truck Emission in China Based on Portable Emissions Measurement Systems, *Environmental Science & Technology*. 43(24): 9507-9511 2009
- Liu, L.-Y., Wang, J.-Z., Wei, G.-L., Guan, Y.-F., Zeng, E.Y.: Polycyclic aromatic hydrocarbons (PAHs) in continental shelf sediment of China: Implications for anthropogenic influences on coastal marine environment, *Environmental Pollution*. 167: 155-162 2012
- 10 Liu, Z.F., Lu, M.M., Birch, M.E., Keener, T.C., Khang, S.J., Liang, F.Y.: Variations of the particulate carbon distribution from a nonroad diesel generator, *Environmental Science & Technology*. 39(20): 7840-7844 2005
- 15 Liu, Z.G., Wall, J.C., Ottinger, N.A., McGuffin, D.: Mitigation of PAH and Nitro-PAH Emissions from Nonroad Diesel Engines, *Environmental Science & Technology*. 49(6): 3662-3671 2015
- Liujun, z.L.Z.J.Y.S.P.K.Z.: Development of Non-road Mobile source Emission inventory for the Pearl River Delta Region, *Environmental Science* 31(4): 886-891 2010
- 20 Longhin, E., Gualtieri, M., Capasso, L., Bengalli, R., Mollerup, S., Holme, J.A., Ovrevik, J., Casadei, S., Di Benedetto, C., Parenti, P., Camatini, M.: Physico-chemical properties and biological effects of diesel and biomass particles, *Environmental Pollution*. 215: 366-375 2016
- 25 Mancilla, Y., Mendoza, A.: A tunnel study to characterize PM<sub>2.5</sub> emissions from gasoline-powered vehicles in Monterrey, Mexico, *Atmospheric Environment*. 59(0): 449-460 2012
- MEP (Ministry of Environmental Protection of China): The technical guide for compiling primary source emission inventories of atmospheric fine particulate matter, 2014.
- 30 MEP (Ministry of Environmental Protection of China): China vehicle environmental management annual report, 2016.
- MEPPRC (Ministry of Environmental Protection of the People's Republic of China): Technical guide for the preparation of a single source emission inventory of atmospheric fine particulate matter: 12, 2014.
- 35 Mirante, F., Alves, C., Pio, C., Pindado, O., Perez, R., Revuelta, M.A., Artinano, B.: Organic composition of size segregated atmospheric particulate matter, during summer and winter sampling campaigns at representative sites in Madrid, Spain, *Atmospheric Research*. 132: 345-361 2013
- 40 Oanh, N.T.K., Thiansathit, W., Bond, T.C., Subramanian, R., Winijkul, E., Paw-armart, I.: Compositional characterization of PM<sub>2.5</sub> emitted from in-use diesel vehicles, *Atmospheric Environment*. 44(1): 15-22 2010
- Pietikainen, M., Valiheikki, A., Oravisjarvi, K., Kolli, T., Huuhtanen, M., Niemi, S., Virtanen, S., Karhu, T., Keiski, R.L.: Particle and NO<sub>x</sub> emissions of a non-road

- diesel engine with an SCR unit: The effect of fuel, *Renewable Energy*. 77: 377-385 2015
- Pio, C., Mirante, F., Oliveira, C., Matos, M., Caseiro, A., Oliveira, C., Querol, X., Alves, C., Martins, N., Cerqueira, M., Camões, F., Silva, H., Plana, F.: Size-segregated chemical composition of aerosol emissions in an urban road tunnel in Portugal, *Atmospheric Environment*. 71(0): 15-25 2013
- Rogge, W.F., Hildemann, L.M., Mazurek, M.A., Cass, G.R., Simoneit, B.R.T.: Sources of fine organic aerosol. 2. Noncatalyst and catalyst-equipped automobiles and heavy-duty diesel trucks, *Environmental Science & Technology*. 27(4): 636-651 1993
- Ruiz, F.A., Cadrazco, M., López, A.F., Sanchez-Valdepeñas, J., Agudelo, J.R.: Impact of dual-fuel combustion with n-butanol or hydrous ethanol on the oxidation reactivity and nanostructure of diesel particulate matter, *Fuel*. 161: 18-25 2015
- Sarvi, A., Fogelholm, C.-J., Zevenhoven, R.: Emissions from large-scale medium-speed diesel engines: 1. Influence of engine operation mode and turbocharger, *Fuel Processing Technology*. 89(5): 510-519 2008a
- Sarvi, A., Fogelholm, C.J., Zevenhoven, R.: Emissions from large-scale medium-speed diesel engines: 2. Influence of fuel type and operating mode, *Fuel Processing Technology*. 89(5): 520-527 2008b
- Sarvi, A., Kilpinen, P., Zevenhoven, R.: Emissions from large-scale medium-speed diesel engines: 3. Influence of direct water injection and common rail, *Fuel Processing Technology*. 90(2): 222-231 2009
- Sarvi, A., Zevenhoven, R.: Large-scale diesel engine emission control parameters, *Energy*. 35(2): 1139-1145 2010
- Schauer, J.J., Kleeman, M.J., Cass, G.R., Simoneit, B.R.T.: Measurement of emissions from air pollution sources. 2. C-1 through C-30 organic compounds from medium duty diesel trucks, *Environmental Science & Technology*. 33(10): 1578-1587 1999
- SEPA (State Environmental Protection Administration), SAQSIQ (State Administration for Quality Supervision and Inspection and Quarantine): Limits and measurement methods for emissions from light-duty vehicles (I), 2001.
- SEPA (State Environmental Protection Administration), SAQSIQ (State Administration for Quality Supervision and Inspection and Quarantine ): Limits and measurements methods for exhaust pollutants from diesel engines of non-road mobile machinery (I, II), 2007.
- SEPA (State Environmental Protection Administration), SAQSIQ (State Administration for Quality Supervision and Inspection and Quarantine): General diesel fuels, 2015.
- Shah, S.D., Ogunyoku, T.A., Miller, J.W., Cocker, D.R.: On-road emission rates of PAH and n-alkane compounds from heavy-duty diesel vehicles, *Environmental Science & Technology*. 39(14): 5276-5284 2005
- Sippula, O., Stengel, B., Sklorz, M., Streibel, T., Rabe, R., Orasche, J., Lintelmann, J., Michalke, B., Abbaszade, G., Radischat, C., Groger, T., Schnelle-Kreis, J., Harndorf, H., Zimmermann, R.: Particle Emissions from a Marine Engine: Chemical Composition and Aromatic Emission Profiles under Various Operating Conditions,

- Environmental Science & Technology. 48(19): 11721-11729 2014
- USEPA (Environmental Protection Agency): Nonroad Engine and Vehicle Emission Study, 1991.
- USEPA (Environmental Protection Agency): Air Radiation. Reducing Air Pollution from Nonroad Engines, <http://www.epa.gov/otaq/cleaner-nonroad/f03011.pdf>.
- USEPA (Environmental Protection Agency) Evaluation of Black Carbon Emission Reductions from Mining Trucks in Russia: The Case of the Murmansk Region, 2015.
- Wang, F., Li, Z., Zhang, K.S., Di, B.F., Hu, B.M.: An overview of non-road equipment emissions in China, *Atmospheric Environment*. 132: 283-289 2016
- Wang, X., Wang, W., Liu, X., Cheng, H., Xu, X.: Health risk assessment of PAHs in fine particulate matter in Beijing *Environmental chemistry*. 2008
- Wang, X.W., Song, C.L., Lv, G., Song, J.N., Li, H., Li, B.: Evolution of in-cylinder polycyclic aromatic hydrocarbons in a diesel engine fueled with n-heptane and n-heptane/toluene, *Fuel*. 158: 322-329 2015
- Wang, Y.-F., Huang, K.-L., Li, C.-T., Mi, H.-H., Luo, J.-H., Tsai, P.-J.: Emissions of fuel metals content from a diesel vehicle engine, *Atmospheric Environment*. 37(33): 4637-4643 2003
- Wu, B., Shen, X., Cao, X., Yao, Z., Wu, Y.: Characterization of the chemical composition of PM<sub>2.5</sub> emitted from on-road China III and China IV diesel trucks in Beijing, China, *Science of The Total Environment*. 551–552: 579-589 2016
- Wu, B., Shen, X., Cao, X., Zhang, W., Wu, H., Yao, Z.: Carbonaceous composition of PM<sub>2.5</sub> emitted from on-road China III diesel trucks in Beijing, China, *Atmospheric Environment*. 116: 216-224 2015
- Yu, W., Yang, T.: Formation mechanism and technical measured for reducing emissions of diesel engine, *Transportation energy saving and environmental protection*. 2007
- Yue, X., Wu, Y., Hao, J.M., Pang, Y., Ma, Y., Li, Y., Li, B.S., Bao, X.F.: Fuel quality management versus vehicle emission control in China, status quo and future perspectives, *Energy Policy*. 79: 87-98 2015
- Yunker, M.B., Macdonald, R.W., Vingarzan, R., Mitchell, R.H., Goyette, D., Sylvestre, S.: PAHs in the Fraser River basin: a critical appraisal of PAH ratios as indicators of PAH source and composition, *Organic Geochemistry*. 33(4): 489-515 2002
- Zhang, Y., Yao, Z., Shen, X., Liu, H., He, K.: Chemical characterization of PM<sub>2.5</sub> emitted from on-road heavy-duty diesel trucks in China, *Atmospheric Environment*. 122: 885-891 2015a
- Zhang, F., Chen, Y., Tian, C., Li, J., Zhang, G., Matthias, V.: Emissions factors for gaseous and particulate pollutants from offshore diesel engine vessels in China, *Atmos. Chem. Phys. Discuss.*, 15(17): 23507-23541 2015b
- Zhang, Z.-H., Balasubramanian, R.: Influence of butanol–diesel blends on particulate emissions of a non-road diesel engine, *Fuel*. 118: 130-136 2014
- Zheng, X., Wu, Y., Jiang, J.K., Zhang, S.J., Liu, H., Song, S.J., Li, Z.H., Fan, X.X., Fu, L.X., Hao, J.M.: Characteristics of On-road Diesel Vehicles: Black Carbon Emissions in Chinese Cities Based on Portable Emissions Measurement, *Environmental Science & Technology*. 49(22): 13492-13500 2015

5

10

15

20

25

**Table captions**

30 | Table 1 Specifications ~~of~~for the tested excavators and trucks

Table 2 Diesel contents from excavators

Table 3 Comparison of average source profiles of PM for different diesel vehicles

5

10

15

20

25

Table 1 Specifications of tested excavators and trucks

| ID | <del>manufacturers</del> Manufacturers | Model<br>years | Emission<br>standards | Powers<br>(kw) | Total weights<br>(kg) | Displacements<br>(L) | Working hours<br>(h) | Mileages<br>(km) |
|----|----------------------------------------|----------------|-----------------------|----------------|-----------------------|----------------------|----------------------|------------------|
| E1 | Volvo                                  | 2013           | stage 2               | 169            | 30,500                | 7.1                  | 2,751                | /                |
| E2 | Hitachi                                | 2007           | pre-stage 1           | 162            | 30,200                | 9.8                  | 16,166               | /                |
| E3 | Sany                                   | 2012           | stage 2               | 128            | 22,900                | /                    | 5,598                | /                |
| E4 | Doosan                                 | 2004           | pre-stage 1           | 110            | 22,000                | 8.1                  | 12,000               | /                |
| E5 | Doosan                                 | 2007           | pre-stage 1           | 40             | 5,250                 | 2.8                  | /                    | /                |
| E6 | Komatsu                                | 2013           | stage 2               | 35             | 5,300                 | 2.4                  | 780                  | /                |
| T1 | Futian                                 | 2010           | China III             | 68             | 4,495                 | 2.6                  | /                    | 100,238          |
| T2 | JAC                                    | 2014           | China IV              | 88             | 4,495                 | 2.8                  | /                    | /                |
| T3 | Futian                                 | 2011           | China III             | 70             | 11,190                | 3.9                  | /                    | 99,000           |
| T4 | Chunlan                                | 2002           | China II              | 125            | 15,480                | /                    | /                    | /                |
| T5 | JAC                                    | 2011           | China III             | 105            | 15,590                | 4.3                  | /                    | 130,000          |

5

10

15

Table 2 Diesel contents from excavators

| ID                                                 | E1   | E2   | E3   | E4   | E5   | E6   | GB 252-2015 |
|----------------------------------------------------|------|------|------|------|------|------|-------------|
| Gross thermal value<br>(MJ/kg)                     | 45.1 | 45.1 | 45.3 | 45.3 | 45.3 | 45.3 | /           |
| Net thermal value<br>(MJ/kg)                       | 42.4 | 42.4 | 42.7 | 42.8 | 42.6 | 42.5 | /           |
| Kinematic viscosity<br>(20 °C)(mm <sup>2</sup> /s) | 4.23 | 4.23 | 3.89 | 4.16 | 4.60 | 4.39 | 3.00-8.00   |
| Moisture (%)                                       | n.d. | n.d. | n.d. | n.d. | n.d. | n.d. | /           |
| Ash content (%)                                    | 0.04 | 0.04 | 0.05 | 4.16 | 0.03 | 0.05 | 0-0.01      |
| C (%)                                              | 86.3 | 86.3 | 86.4 | 86.8 | 85.9 | 85.9 | /           |
| H (%)                                              | 11.6 | 11.6 | 11.5 | 11.2 | 12.0 | 12.1 | /           |
| O (%)                                              | 1.99 | 1.99 | 2.01 | 1.85 | 2.07 | 1.86 | /           |
| N (%)                                              | 0.05 | 0.05 | 0.05 | 0.04 | 0.06 | 0.05 | /           |
| S (ppm)                                            | 400  | 400  | 700  | 1100 | 200  | 200  | <350        |

n.d. = not detected

2

3

Table 3 Comparison of average chemical constituents of PM for different diesel vehicles (%)

| Vehicle types                 | Excavators | Trucks | Trucks            | Medium-duty trucks     | Diesel vehicles    | Light-duty <del>Diesel-diesel</del> engines | Marine engine          | Non-road generator   |
|-------------------------------|------------|--------|-------------------|------------------------|--------------------|---------------------------------------------|------------------------|----------------------|
| Methods                       | On-road    |        | On-road           | Dynamometer            | Tunnel             | Dynamometer                                 | Dynamometer            | Dynamometer          |
| Reference                     | This study |        | (Wu et al., 2016) | (Schauer et al., 1999) | (Cui et al., 2016) | (Alves et al., 2015b)                       | (Sippula et al., 2014) | (Liang et al., 2005) |
| <b>EC</b>                     | 33.3       | 26.9   | 55.3              | 30.8                   | 39.5               | 69.9                                        | 14.1                   |                      |
| <b>OC</b>                     | 39.2       | 9.89   | 31.8              | 19.7                   | 27.2               | 12.7                                        | 60.0                   |                      |
| <b>Ions</b>                   | 0.614      | 4.67   | 1.49              | 1.96                   | 11.7               | 0.638                                       |                        |                      |
| NH <sub>4</sub> <sup>+</sup>  | 0.044      | 0.215  | 0.188             | 0.730                  | 2.06               | 0.005                                       |                        |                      |
| Cl <sup>-</sup>               | 0.098      | 0.110  | 0.247             |                        | 1.06               | 0.115                                       |                        |                      |
| NO <sub>3</sub> <sup>-</sup>  | 0.278      | 1.08   | 0.529             | 0.230                  | 3.81               | 0.459                                       |                        |                      |
| SO <sub>4</sub> <sup>2-</sup> | 0.193      | 3.27   | 0.529             | 1.00                   | 4.80               | 0.059                                       |                        |                      |
| <b>Elements</b>               | 1.76       | 0.941  | 0.493             | 0.200                  | 12.8               | 0.069                                       | 3.17                   |                      |
| Na                            | 0.245      | 0.047  |                   |                        | 0.287              | 0.041                                       | 0.564                  |                      |
| Mg                            | 0.106      | 0.079  |                   |                        | 1.71               | 0.008                                       | 0.422                  |                      |
| K                             | 0.197      | 0.028  |                   |                        | 0.872              | 0.002                                       | 0.671                  |                      |
| Ca                            | 0.241      | 0.211  |                   | 0.030                  | 5.69               | 0.017                                       | 1.01                   |                      |
| Ti                            | 0.008      | 0.011  | 0.145             |                        | 0.206              | 0.0001                                      | 0.005                  |                      |
| V                             | 0.001      | 0.000  | 0.001             |                        | 0.008              |                                             | 0.044                  |                      |
| Cr                            | 0.035      | 0.039  | 0.011             | 0.010                  | 0.013              |                                             | 0.010                  |                      |
| Mn                            | 0.013      | 0.009  | 0.002             | 0.010                  | 0.064              |                                             | 0.006                  |                      |

Continued Table 3

|                |       |        |        |       |       |        |       |        |
|----------------|-------|--------|--------|-------|-------|--------|-------|--------|
| Fe             | 0.815 | 0.276  | 0.247  | 0.050 | 3.71  | 0.0003 | 0.138 |        |
| Co             | 0.001 | 0.005  | 0.0002 | 0.010 | 0.002 |        | 0.006 |        |
| Ni             | 0.015 | 0.006  | 0.002  | nd    |       |        | 0.016 |        |
| Cu             | 0.042 | 0.107  | 0.004  | 0.010 | 0.013 |        | 0.130 |        |
| Zn             | 0.027 | 0.111  | 0.076  | 0.070 | 0.213 | 0.0001 | 0.130 |        |
| Pb             | 0.011 | 0.010  | 0.005  | 0.010 | 0.008 |        | 0.013 |        |
| <b>Alkanes</b> | 5.14  | 1.73   |        | 0.222 |       |        | 1.37  | 0.831  |
| C12            | 0.003 | 0.020  |        |       |       |        |       | 0.003  |
| C13            | 0.003 | nd     |        |       |       |        |       | 0.006  |
| C14            | 0.019 | 0.0003 |        |       |       |        |       | 0.020  |
| C15            | 0.057 | 0.013  |        | 0.001 |       |        |       | 0.056  |
| C16            | 0.201 | 0.062  |        | 0.005 |       |        |       | 0.116  |
| C17            | 0.107 | 0.144  |        | 0.003 |       |        |       | 0.265  |
| C18            | 0.587 | 0.215  |        | 0.002 |       |        | 0.049 | 0.148  |
| C19            | 0.777 | 0.308  |        | 0.002 |       |        | 0.120 | 0.126  |
| C20            | 0.977 | 0.311  |        | 0.052 |       |        | 0.260 | 0.074  |
| C21            | 0.516 | 0.290  |        | 0.022 |       |        |       | 0.014  |
| C22            | 0.769 | 0.143  |        | 0.028 |       |        | 0.264 | 0.001  |
| C23            | 0.349 | 0.099  |        | 0.025 |       |        | 0.177 | 0.001  |
| C24            | 0.245 | 0.061  |        | 0.022 |       |        | 0.128 | 0.001  |
| C25            | 0.197 | 0.032  |        | 0.014 |       |        | 0.083 | 0.0004 |

Continued Table 3

|             |       |         |       |       |        |
|-------------|-------|---------|-------|-------|--------|
| C26         | 0.119 | 0.016   | 0.019 | 0.075 |        |
| C27         | 0.031 | 0.009   | 0.014 | 0.056 |        |
| C28         | 0.023 | 0.004   | 0.011 | 0.058 |        |
| C29         | 0.013 | 0.002   | 0.003 | 0.046 |        |
| C30         | 0.007 | 0.001   |       | 0.025 |        |
| C31         | 0.010 | 0.002   |       | 0.017 |        |
| C32         | 0.010 | 0.001   |       | 0.007 |        |
| C33         | 0.010 | 0.00001 |       | 0.002 |        |
| C34         | 0.010 | 0.0004  |       |       |        |
| C35         | 0.013 | 0.00004 |       |       |        |
| C36         | 0.016 |         |       |       |        |
| C37         | 0.018 |         |       |       |        |
| C38         | 0.025 |         |       |       |        |
| C39         | 0.031 |         |       |       |        |
| C40         | 0.003 |         |       |       |        |
| <b>PAHs</b> | 0.098 | 0.130   | 0.251 | 0.021 | 0.021  |
| Nap         | 0.008 | 0.001   | 0.014 |       | 0.0004 |
| Acy         | 0.005 | 0.0003  | 0.006 |       | 0.0002 |
| Ace         | 0.001 | 0.00004 | 0.001 |       | 0.0003 |
| Flu         | 0.002 | 0.0001  |       |       | 0.001  |
| Phe         | 0.005 | 0.021   | 0.007 |       | 0.008  |
| Ant         | 0.001 | 0.001   | 0.002 |       | 0.0004 |

|                            |        |         |        |       |        |        |
|----------------------------|--------|---------|--------|-------|--------|--------|
| Fluo                       | 0.026  | 0.010   |        | 0.027 | 0.009  | 0.002  |
| Pyr                        | 0.028  | 0.088   |        | 0.052 | 0.008  | 0.007  |
| BaA                        | 0.007  | 0.001   |        | 0.014 | 0.001  | 0.0005 |
| Chry                       | 0.008  | 0.002   |        | 0.025 | 0.003  | 0.0005 |
| BbF                        | 0.002  | 0.001   |        | 0.016 |        | 0.0003 |
| BkF                        | 0.001  | 0.0001  |        | 0.003 |        | 0.0002 |
| BaP                        | 0.0004 | 0.00001 |        | 0.009 |        | 0.0004 |
| IcdP                       | 0.001  | 0.00002 |        | 0.013 | 0.0004 | 0.001  |
| DahA                       | 0.000  | 0.001   |        | 0.001 |        | 0.0002 |
| BghiP                      | 0.003  | 0.004   |        | 0.062 | 0.0003 | 0.0003 |
| <b>Hopane,<br/>sterane</b> | 0.026  | 0.011   | 0.014  | 0.167 | 0.143  |        |
| ABB                        | 0.001  | 0.0005  | 0.0004 | 0.007 |        |        |
| AAA                        | 0.002  | 0.001   | 0.001  | 0.006 |        |        |
| Tm                         | 0.001  | 0.001   | 0.001  | 0.014 | 0.012  |        |
| 30AB                       | 0.011  | 0.005   | 0.006  | 0.065 | 0.069  |        |
| 29AB                       | 0.011  | 0.004   | 0.006  | 0.075 | 0.061  |        |

4 | n.d. = not detected

## Figure captions

Figure 1 The routes for diesel trucks

Figure 2 Particulate matter sampling system

Figure 3  $EF_{PM}$  for excavators with different ~~operating~~operational modes and emission standards (a) and the correlation with sulfur contents (b)

Figure 4 Diesel trucks  $EF_{PM}$  for different emission standards, vehicle sizes and driving conditions

Figure 5 PM compositional constituents for individual vehicles (%)

Figure 6 OC/EC ratios ~~under-in~~ different ~~operating~~operational modes and driving conditions for excavators and trucks

Figure 7 Cross plots for the ratios of  $BaA/(BaA+Chry)$  vs  $IcdP/(IcdP+BghiP)$  and  $BaA/(BaA+Chry)$  vs  $Flua/(Flua+Pry)$  and comparison with those from other diesel vehicle sources.

Figure 8  $BaP_{eq}$  for parent PAHs in each tested excavators (A) and trucks (B)

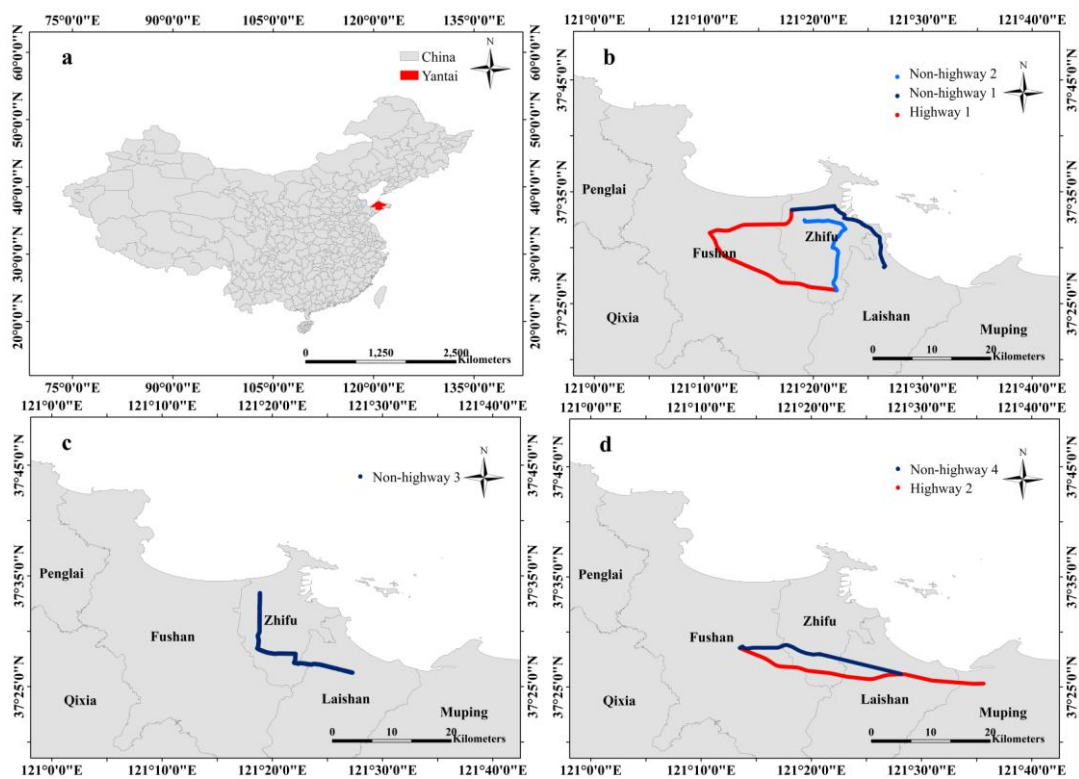

Figure 1 The routes for diesel trucks; a was the site of Yantai; b was the route for China III and China IV light-duty diesel trucks; c was the route for China II heavy-duty diesel truck; d was the route for China III medium-duty and heavy-duty trucks

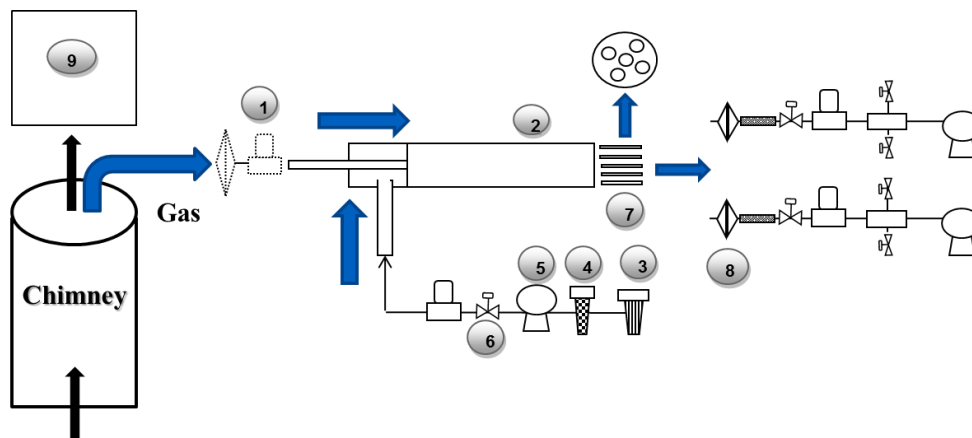

Figure 2 Particulate matter sampling system; 1 ~~was~~is the flowmeter; 2 ~~was~~is the dilute tunnel; 3 ~~was~~is the filterator; 4 ~~was~~is the activated carbon; 5 ~~was~~is the fan; 6 ~~was~~is the valve; 7 ~~was~~is the flow divider; 8 ~~was~~is the filter membrane sampler; and 9 ~~was~~is the exhaust analyzer

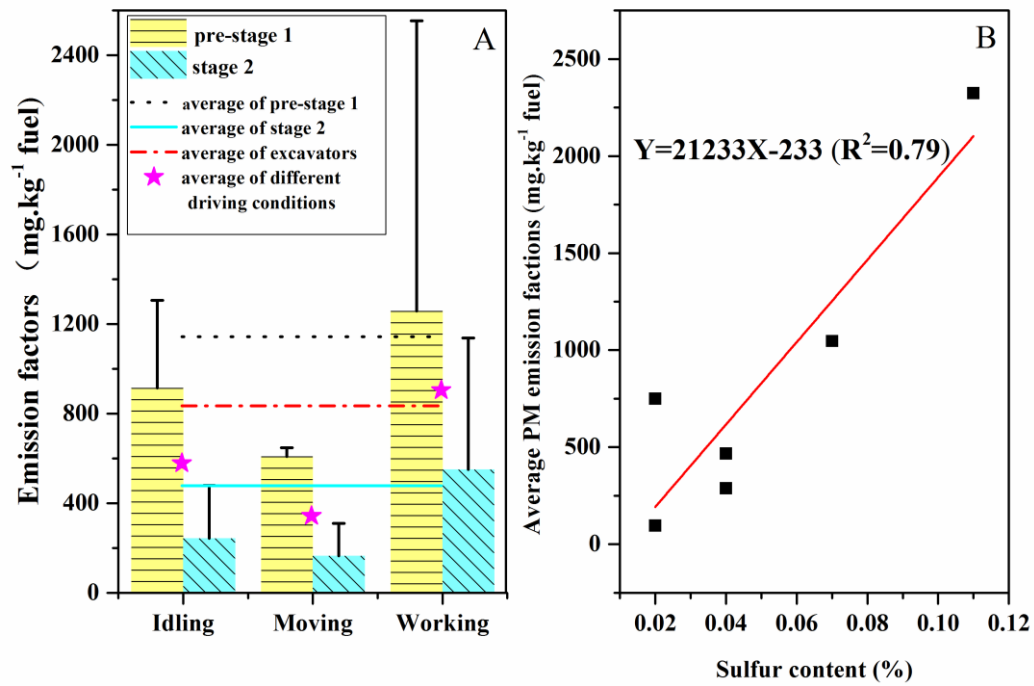

Figure 3 EF<sub>PM</sub> for excavators with different ~~operating~~operational modes and emission standards (A) and the correlation with sulfur contents (B)

5

10

15

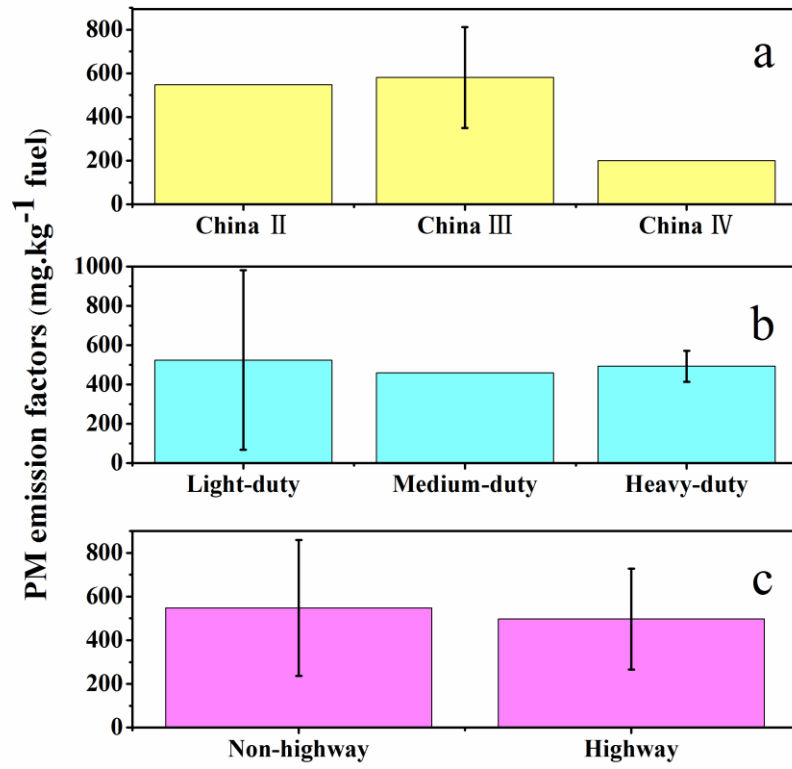

Figure 4 Diesel trucks EF<sub>PM</sub> for different emission standards (a), vehicle sizes (b) and driving conditions (c)

5

10

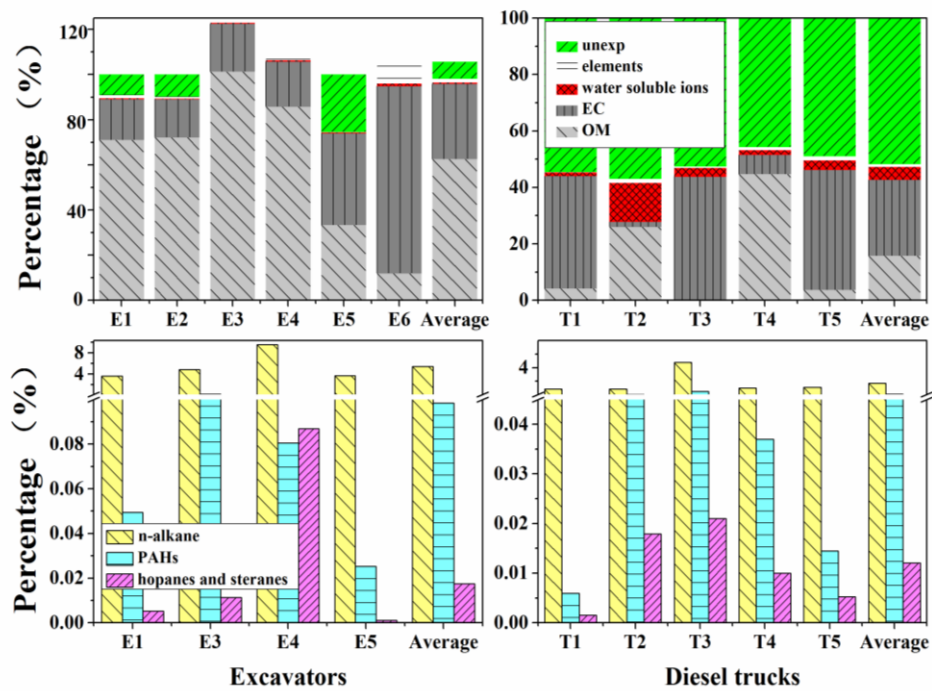

Figure 5 Compositional constituents of PM for individual vehicles (%)

5

10

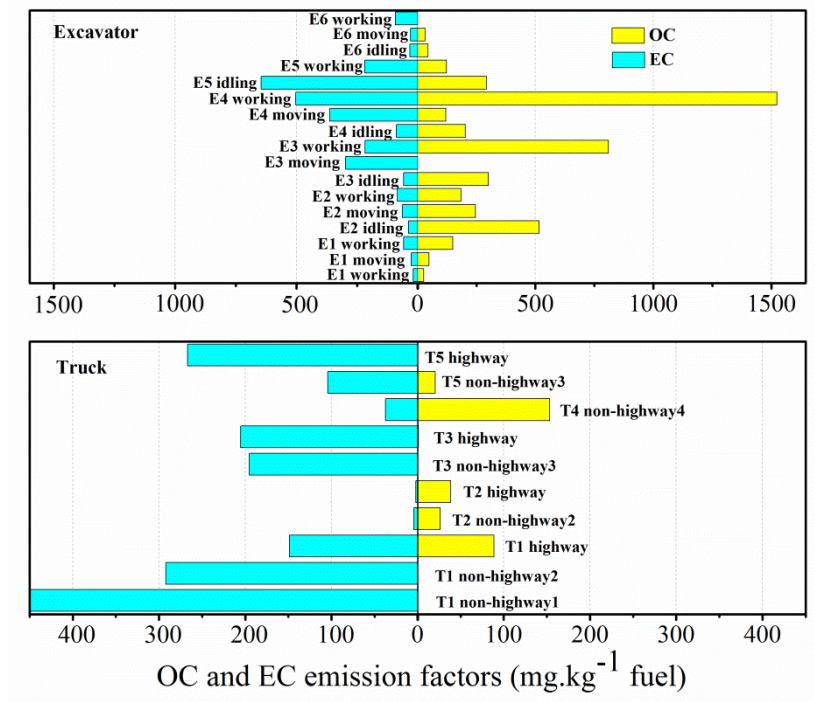

Figure 6 OC/EC ratios ~~under-in~~ different ~~operating-operational~~ modes and driving conditions for excavators and trucks

5

10

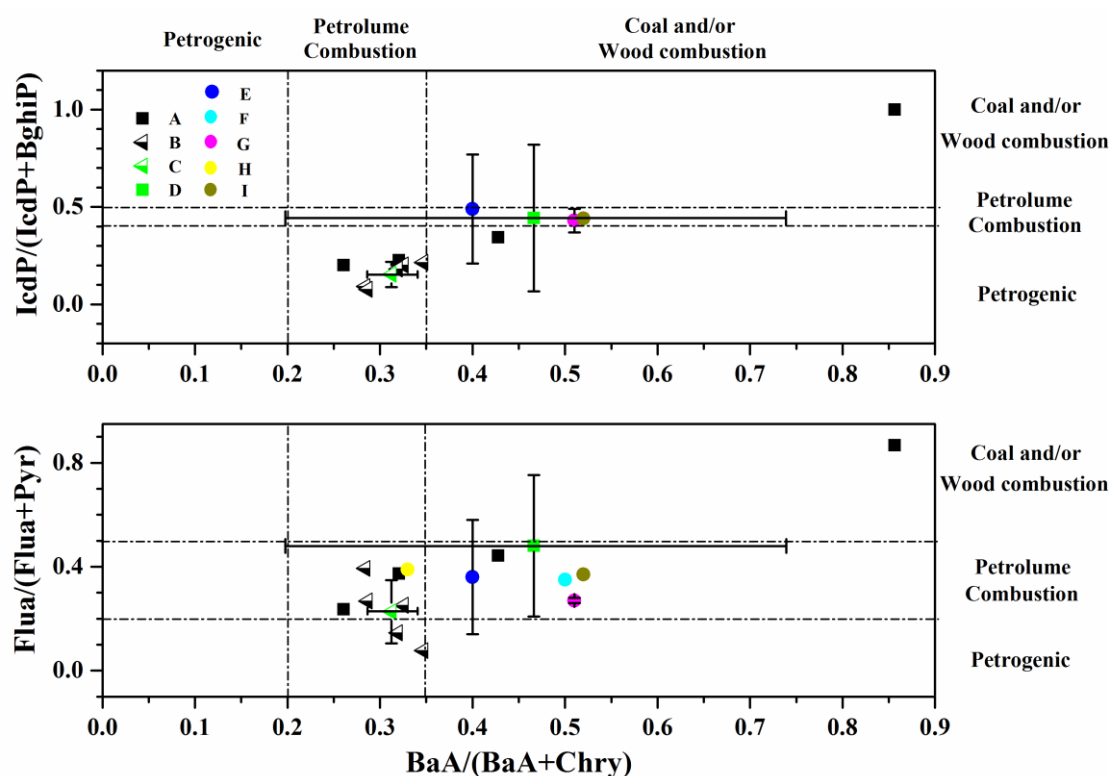

Figure 7 Cross plots for the ratios of  $BaA/(BaA+Chry)$  vs  $IcdP/(IcdP+BghiP)$  and  $BaA/(BaA+Chry)$  vs  $Flua/(Flua+Pyr)$  and comparison with those from other diesel vehicle sources. A and B ~~were~~are the isomer ratios of the PAHs ~~for~~from the excavators and trucks-, respectively, tested in this study, ~~respectively~~; C and D ~~were~~are the average isomer ratios of PAHs for trucks and excavators tested in this study; E, F, G, H, I ~~were~~are results obtained from Liu et al. (2015), Wang et al. (2015), Shah et al. (2005), Schauer et al. (1999), Chen et al. (2013)

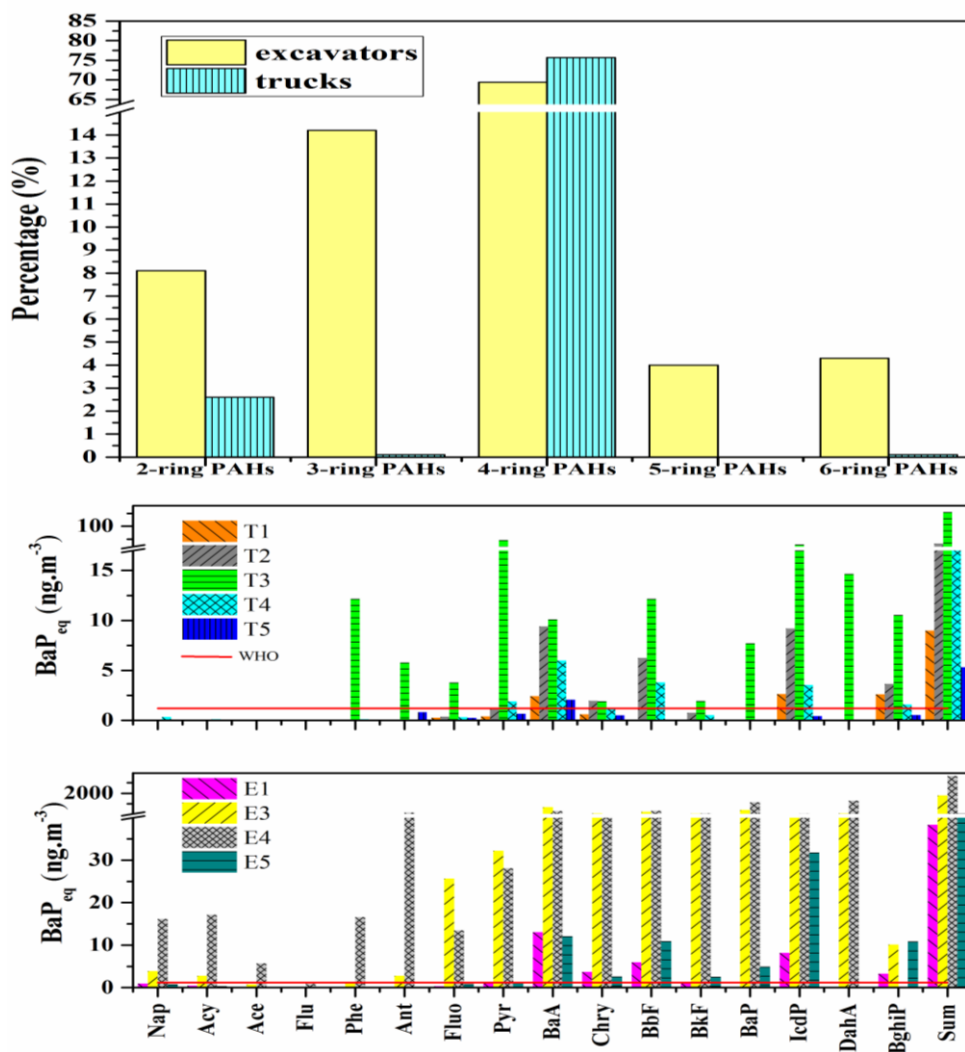

Figure 8 a) Percentages of each ring PAHs to total PAHs; BaP<sub>eq</sub> for parent PAHs in each tested trucks (Ab) and excavators (Bc)
