# Supplementary material for: Measurement on PM and its chemical compositions for real-world emissions from non-road and on-road diesel vehicles
Source: Copernicus journal article supplement (doi:10.5194/acp-2016-1038), 2016-12-06
Supplement: Supplementary file [file acp-2016-1038-AC2-supplement.zip]

# Measurement on PM and its chemical compositions for real-world emissions from non-road and on-road diesel vehicles

Min Cui<sup>a</sup>, Yingjun Chen<sup>a\*</sup>, Yanli Feng<sup>b\*</sup>, Cheng Li<sup>c</sup>, Junyu Zheng<sup>c\*</sup>, Chongguo Tian<sup>d</sup>,

5 Caiqing Yan<sup>e</sup>, Mei Zheng<sup>e</sup>

<sup>a</sup> Key Laboratory of Cities' Mitigation and Adaptation to Climate Change in Shanghai  
(China Meteorological Administration), College of Environmental Science and  
Engineering, Tongji University, Shanghai, China

<sup>b</sup> Institute of Environmental Pollution and Health, School of Environmental and  
10 Chemical Engineering, Shanghai University, Shanghai, China

<sup>c</sup> Laboratory for Atmospheric Research and Environmental Simulation, School of  
Environment and Energy, South China University of Technology, Guangzhou, China

<sup>d</sup> Key Laboratory of Coastal Zone Environmental Processes and Ecological  
Remediation, Yantai Institute of Coastal Zone Research, Chinese Academy of  
15 Sciences, Yantai, China

<sup>e</sup> State Key Joint Laboratory of Environmental Simulation and Pollution Control,  
College of Environmental Sciences and Engineering, Peking University, Beijing,  
China

Correspondence to: Yingjun Chen ([yjchentj@tongji.edu.cn](mailto:yjchentj@tongji.edu.cn))

20 Yanli Feng ([fengyanli@shu.edu.cn](mailto:fengyanli@shu.edu.cn))

Junyu Zheng ([Zhengjunyu\\_work@hotmail.com](mailto:Zhengjunyu_work@hotmail.com))

25

30

## Supplementary Materials:

Figure S1 Population and PM emission from on-road trucks (A); population percentages of each types of construction equipment (B)

Figure S2 Annual productions of excavators in China

5 Figure S3 Velocity profiles of diesel trucks under different roads

Figure S4 Box plots of velocity and road grade for different trucks under different roads

Figure S5 PM emission factors for different power excavators

Table S1 Pollutions emission of generation standards for trucks

10 Table S2 Pollutions emission of generation standards for excavators

Table S3 Mass concentrations of pollutants emitted from E4 in three idling repeat tests

Table S4 PM mass concentrations emitted from trucks in some repeat tests

Table S5 PM Fueled-based emission factors for excavators

Table S6 Source profiles of PM emitted from excavators and trucks

15

20

25

30

35

40

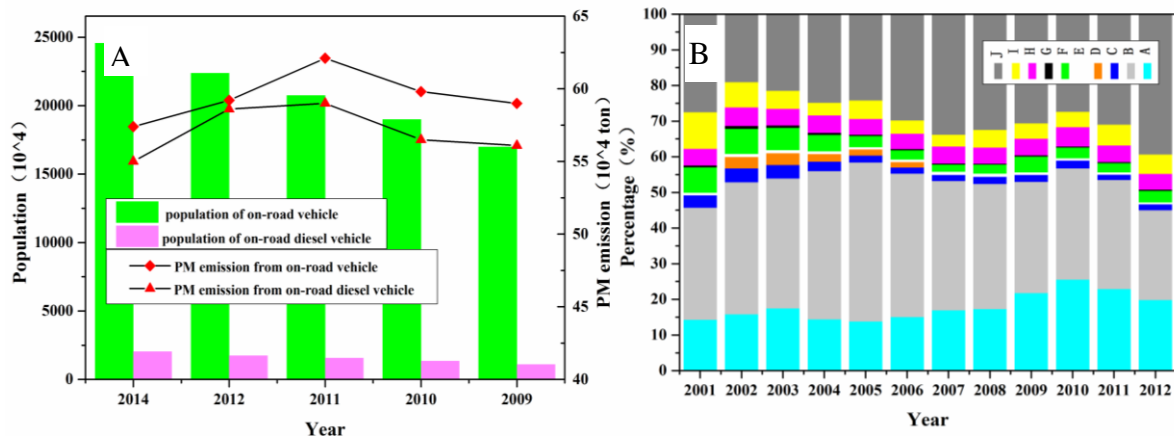

Figure S1 Population and PM emission from on-road trucks (A); population percentages of each types of construction equipment (A, B, C, D, E, F, G, H, I, J represent excavator, loader, bulldozer, concrete mixer, leveler, roller, paver, construction crane, tower crane, forklift, respectively.) (B).

10

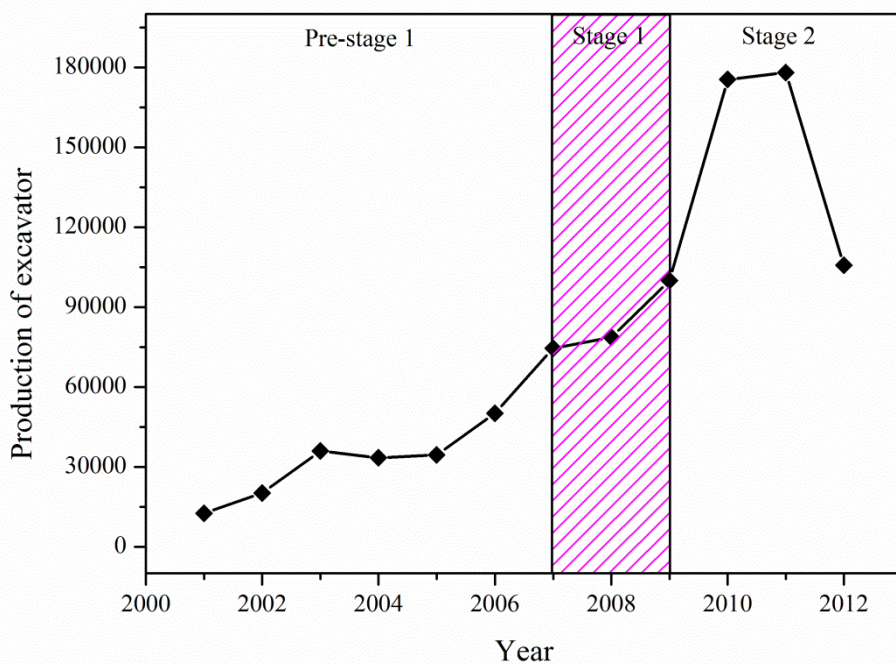

Figure S2 Annual productions of excavators in China

15

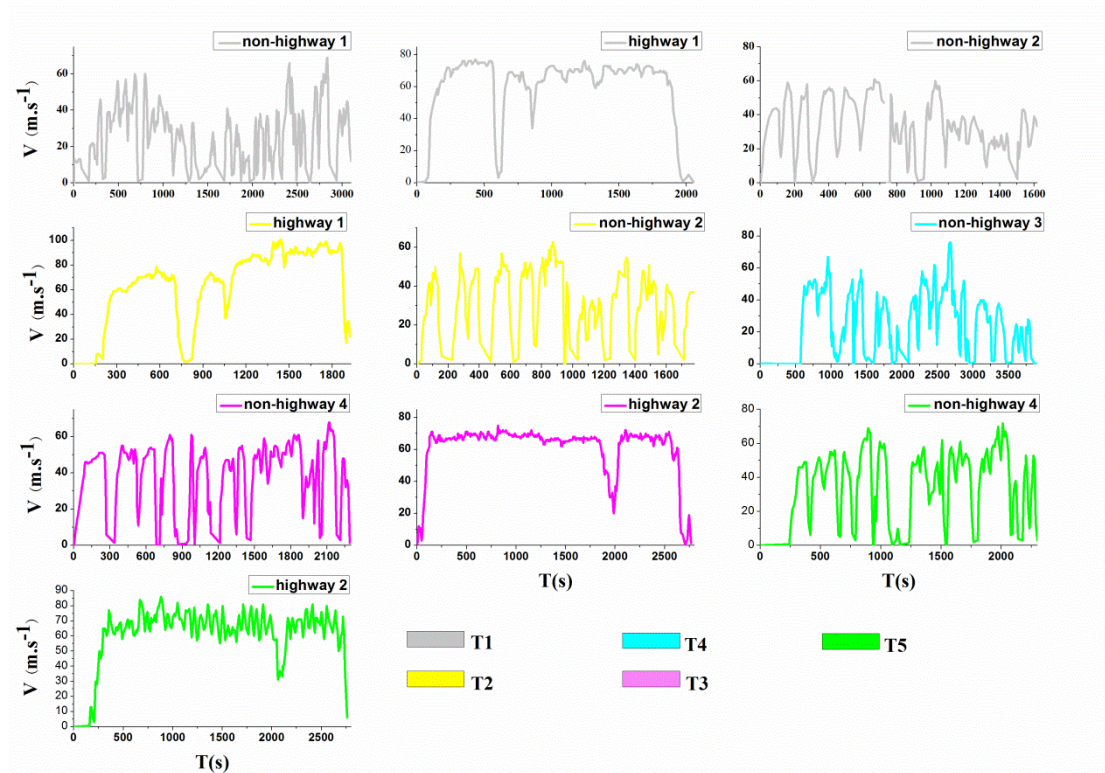

Figure S3 Velocity profiles of diesel trucks under different roads

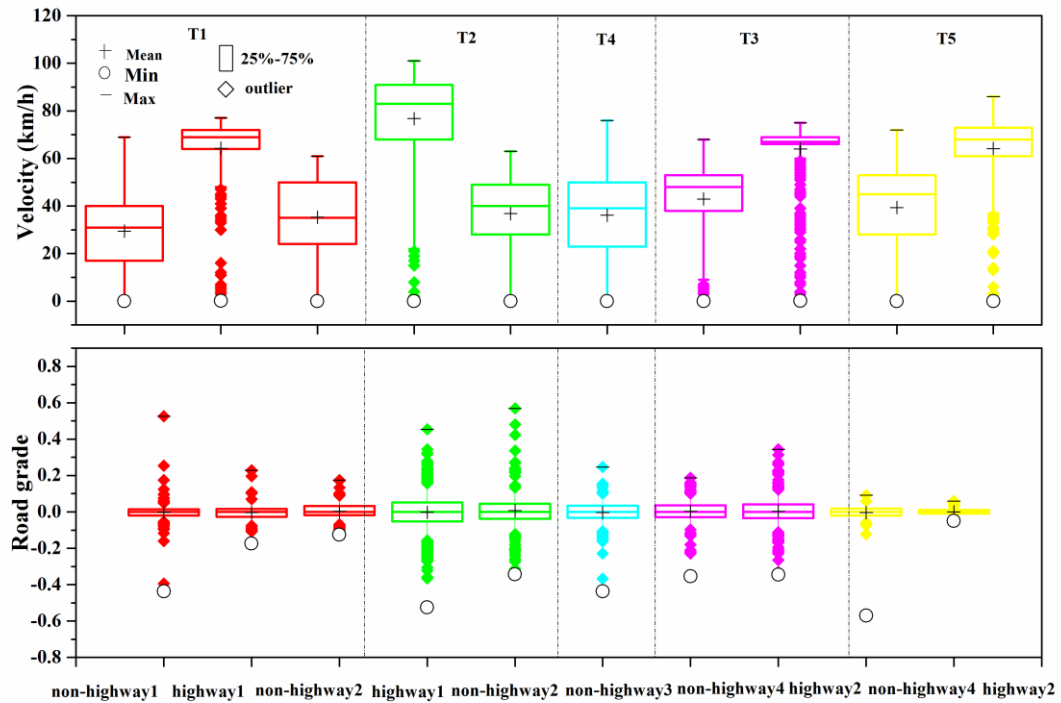

5 Figure S4 Box plots of velocity and road grade for different trucks under different roads

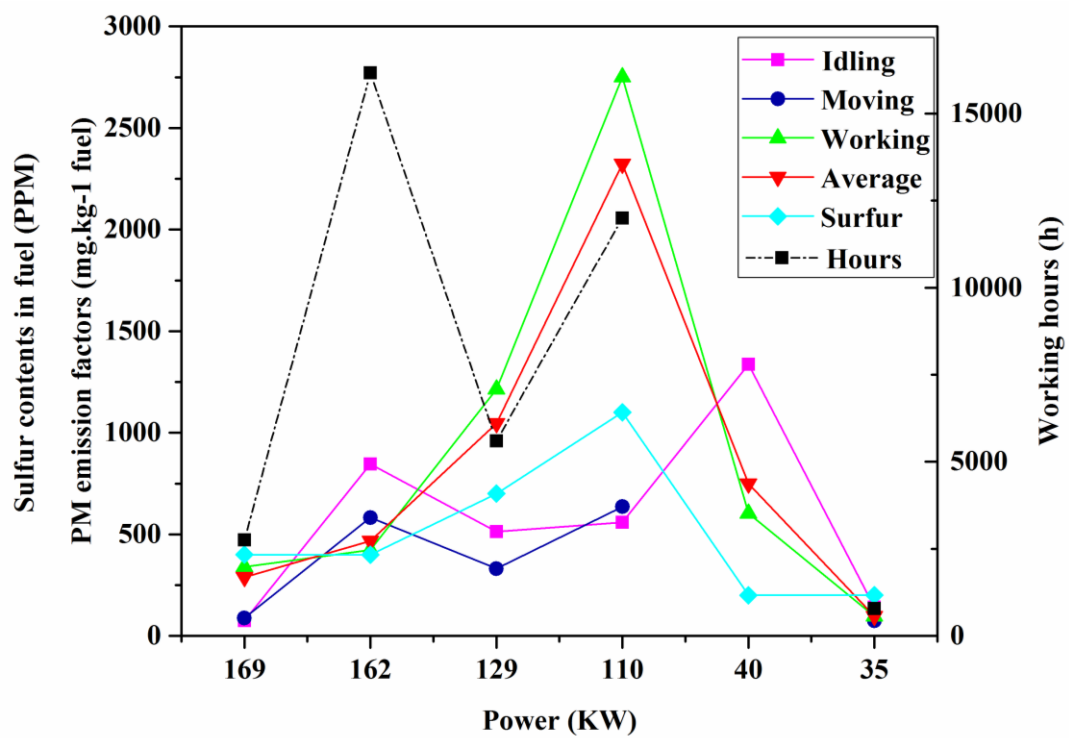

Figure S5 PM emission factors for different power excavators

Table S1 Pollutions emission of generation standards for trucks (g kwh<sup>-1</sup>)

| Emission Standards | Standards        | Implementation Data | Test Methods | CO   | NMHC | NOx | PM   |
|--------------------|------------------|---------------------|--------------|------|------|-----|------|
| China I            | GB<br>17691-2001 | 2001/9/1            | /            | 4.5  | 1.1  | 8   | 0.49 |
| China II           | GB<br>17691-2001 | 2004/9/1            | /            | 4    | 1.1  | 7   | 0.15 |
| China III          | GB<br>17691-2005 | 2007/1/1            | ESC/ELR      | 2.1  | 0.66 | 5   | 0.1  |
|                    |                  |                     | ETC          | 5.45 | 0.78 | 1.6 | 5    |
| China IV           | GB<br>17691-2005 | 2010/1/1            | ESC/ELR      | 1.5  | 0.46 | 3.5 | 0.02 |
|                    |                  |                     | ETC          | 4    | 0.55 | 1.1 | 3.5  |
| China V            | GB<br>17691-2005 | 2012/1/1            | ESC/ELR      | 1.5  | 0.46 | 2   | 0.02 |
|                    |                  |                     | ETC          | 4    | 0.55 | 1.1 | 2    |

Table S2 Pollutions emission of generation standards for excavators (g kwh<sup>-1</sup>)

| Emission Standards | Standards        | Implementation Data | Rated Power (kw) | CO   | HC  | NOx  | PM   |
|--------------------|------------------|---------------------|------------------|------|-----|------|------|
| Stage 1            | GB<br>20891-2007 | 2007/10/1           | 130≤Pmax≤560     | 5    | 1.3 | 9.2  | 0.54 |
|                    |                  |                     | 75≤Pmax<130      | 5    | 1.3 | 9.2  | 0.7  |
|                    |                  |                     | 37≤Pmax<75       | 6.5  | 1.3 | 9.2  | 0.85 |
|                    |                  |                     | 18≤Pmax<37       | 8.4  | 2.2 | 10.8 | 1    |
|                    |                  |                     | 8≤Pmax<18        | 8.4  | /   | /    | /    |
|                    |                  |                     | 0<Pmax<8         | 12.3 | /   | /    | /    |
| Stage 2            |                  | 2009/10/1           | 130≤Pmax≤560     | 3.5  | 1   | 6    | 0.2  |
|                    |                  |                     | 75≤Pmax<130      | 5    | 1   | 6    | 0.3  |
|                    |                  |                     | 37≤Pmax<75       | 5    | 1.3 | 7    | 0.4  |
|                    |                  |                     | 18≤Pmax<37       | 5.5  | 1.5 | 8    | 0.8  |
|                    |                  |                     | 8≤Pmax<18        | 6.6  | /   | /    | 0.8  |
|                    |                  |                     | 0<Pmax<8         | 8    | /   | /    | 1    |

Table S3 Mass concentrations of pollutants emitted from E4 in three idling repeat tests

|    | O <sub>2</sub> <sup>a</sup> (%) | CO <sub>2</sub> <sup>a</sup> (%) | CO <sup>a</sup> (ppm) | NOx <sup>a</sup> (ppm) | PM (mg m <sup>-3</sup> ) | OC (mg m <sup>-3</sup> ) | EC (mg m <sup>-3</sup> ) |
|----|---------------------------------|----------------------------------|-----------------------|------------------------|--------------------------|--------------------------|--------------------------|
| 1  | 16.2                            | 3.4                              | 309                   | 453                    | 11.9                     | 4.3                      | 1.9                      |
| 2  | 16.3                            | 3.4                              | 257                   | 457                    | 14.6                     | 6.1                      | 2.9                      |
| 3  | 16.3                            | 3.4                              | 262                   | 445                    | 14.4                     | 6.8                      | 2.5                      |
| SD | 0.08                            | 0.01                             | 28.6                  | 5.68                   | 1.55                     | 1.26                     | 0.53                     |

a: the datum were presented on other unpublished research

Table S4 PM mass concentrations emitted from trucks in some repeat tests (mg m<sup>-3</sup>)

| Trucks                | Roads         | 1    | 2    | 3    | SD   |
|-----------------------|---------------|------|------|------|------|
| Light duty-China III  | non-highway 1 | 15.0 | 16.2 | /    | 0.87 |
|                       | highway 1     | 19.8 | 30.6 | /    | 7.67 |
|                       | non-highway 2 | 21.3 | 16.1 | /    | 3.68 |
| Heavy duty-China II   | non-highway 3 | 7.87 | 6.11 | 6.69 | 0.89 |
| Medium duty-China III | non-highway 4 | 11.0 | 10.3 | /    | 0.49 |
|                       | highway 2     | 8.79 | 17.1 | /    | 5.85 |
| Heavy duty-China III  | non-highway 4 | 5.29 | 9.56 | 6.99 | 2.15 |
|                       | highway 2     | 10.6 | 7.42 | /    | 2.24 |

5

Table S5 PM Fueled-based emission factors for excavators (mg kg<sup>-1</sup> fuel)

| serial number of excavators | idling | moving | working | average |
|-----------------------------|--------|--------|---------|---------|
| E1                          | 75.3   | 88.7   | 340     | 289     |
| E2                          | 845    | 582    | 422     | 468     |
| E3                          | 513    | 331    | 1,214   | 1,047   |
| E4                          | 559    | 636    | 2,750   | 2,323   |
| E5                          | 1,336  | /      | 603     | 749     |
| E6                          | 141    | 75.0   | 97.8    | 96.5    |

10



Table S6 Chemical constituents of PM emitted from individual excavator and truck (%)

|                               | E1     | E2     | E3      | E4     | E5      | E6    | T1    | T2    | T3    | T4    | T5    |
|-------------------------------|--------|--------|---------|--------|---------|-------|-------|-------|-------|-------|-------|
| EC                            | 18.1   | 16.9   | 21.2    | 19.9   | 40.6    | 83.0  | 39.8  | 1.80  | 43.7  | 6.83  | 42.5  |
| OC                            | 44.4   | 45.2   | 63.4    | 53.7   | 20.9    | 7.5   | 2.65  | 16.3  | 0.139 | 28.0  | 2.36  |
| NH <sub>4</sub> <sup>+</sup>  | 0.004  | 0.029  | 0.061   | 0.083  | 0.042   | 0.045 | 0.015 | 0.979 | 0.080 | 0.000 | 0.000 |
| Cl <sup>-</sup>               | 0.357  | 0.004  | 0.010   | 0.003  | 0.007   | 0.209 | 0.070 | 0.411 | 0.053 | 0.007 | 0.009 |
| NO <sub>3</sub> <sup>-</sup>  | 0.106  | 0.285  | 0.245   | 0.112  | 0.357   | 0.562 | 0.908 | 0.982 | 1.628 | 1.409 | 0.452 |
| SO <sub>4</sub> <sup>2-</sup> | 0.064  | 0.016  | 0.134   | 0.520  | 0.032   | 0.395 | 0.423 | 11.4  | 1.41  | 0.191 | 2.89  |
| Na                            | 0.076  | 0.066  | 0.010   | 0.007  | 0.060   | 1.252 | 0.016 | 0.103 | 0.038 | 0.052 | 0.029 |
| Mg                            | 0.089  | 0.056  | 0.011   | 0.013  | 0.007   | 0.458 | 0.000 | 0.085 | 0.047 | 0.171 | 0.091 |
| K                             | 0.080  | 0.055  | 0.010   | 0.058  | 0.024   | 0.955 | 0.011 | 0.043 | 0.019 | 0.042 | 0.028 |
| Ca                            | 0.193  | 0.125  | 0.028   | 0.035  | 0.040   | 1.024 | 0.016 | 0.305 | 0.141 | 0.458 | 0.138 |
| Ti                            | 0.006  | 0.003  | 0.001   | 0.002  | nd      | 0.037 | 0.000 | 0.022 | 0.012 | 0.014 | 0.007 |
| V                             | 0.0003 | 0.0002 | 0.0001  | 0.0003 | 0.00004 | 0.004 | 0.000 | 0.000 | 0.000 | 0.000 | 0.000 |
| Cr                            | 0.024  | 0.050  | 0.008   | 0.005  | 0.003   | 0.120 | 0.003 | 0.046 | 0.012 | 0.021 | 0.110 |
| Mn                            | 0.010  | 0.006  | 0.001   | 0.004  | 0.0003  | 0.057 | 0.000 | 0.010 | 0.002 | 0.011 | 0.022 |
| Fe                            | 0.837  | 0.455  | 0.084   | 0.183  | 0.058   | 3.275 | 0.031 | 0.282 | 0.078 | 0.330 | 0.660 |
| Co                            | 0.0002 | 0.0001 | 0.00002 | 0.0001 | 0.002   | 0.001 | 0.001 | 0.010 | 0.007 | 0.005 | 0.004 |
| Ni                            | 0.025  | 0.008  | 0.002   | 0.003  | 0.003   | 0.051 | 0.001 | 0.013 | 0.004 | 0.003 | 0.011 |
| Cu                            | 0.036  | 0.029  | 0.005   | 0.030  | 0.002   | 0.151 | 0.002 | 0.283 | 0.028 | 0.013 | 0.210 |
| Zn                            | 0.032  | 0.015  | 0.002   | 0.036  | 0.007   | 0.070 | 0.009 | 0.241 | 0.078 | 0.031 | 0.196 |
| Pb                            | 0.006  | 0.007  | 0.001   | 0.001  | 0.002   | 0.049 | 0.001 | 0.028 | 0.003 | 0.006 | 0.013 |
| C12                           | nd     |        | nd      | 0.010  | nd      |       | nd    | 0.099 | nd    | nd    | nd    |
| C13                           | nd     |        | 0.001   | 0.009  | nd      |       | nd    | nd    | nd    | nd    | nd    |
| C14                           | nd     |        | 0.001   | 0.019  | nd      |       | nd    | 0.001 | nd    | nd    | nd    |

|     |       |       |       |        |       |       |         |        |         |
|-----|-------|-------|-------|--------|-------|-------|---------|--------|---------|
| C15 | nd    | 0.001 | 0.121 | 0.001  | nd    | nd    | 0.067   | nd     | nd      |
| C16 | nd    | 0.001 | 0.720 | nd     | nd    | nd    | 0.311   | nd     | nd      |
| C17 | 0.004 | 0.048 | 0.115 | 0.009  | 0.004 | 0.009 | 0.667   | 0.020  | 0.018   |
| C18 | 0.035 | 0.314 | 1.794 | 0.224  | 0.037 | 0.060 | 0.722   | 0.133  | 0.124   |
| C19 | 0.321 | 0.759 | 1.597 | 0.750  | 0.161 | 0.150 | 0.737   | 0.220  | 0.273   |
| C20 | 0.648 | 1.006 | 1.880 | 0.985  | 0.207 | 0.190 | 0.651   | 0.236  | 0.272   |
| C21 | 1.09  | 1.108 | 0.011 | 0.929  | 0.205 | 0.183 | 0.616   | 0.204  | 0.240   |
| C22 | 0.485 | 0.524 | 1.036 | 0.324  | 0.085 | 0.079 | 0.385   | 0.079  | 0.088   |
| C23 | 0.419 | 0.423 | 0.750 | 0.223  | 0.061 | 0.056 | 0.266   | 0.059  | 0.053   |
| C24 | 0.296 | 0.288 | 0.546 | 0.124  | 0.039 | 0.034 | 0.166   | 0.039  | 0.027   |
| C25 | 0.183 | 0.186 | 0.247 | 0.062  | 0.022 | 0.016 | 0.090   | 0.022  | 0.012   |
| C26 | 0.069 | 0.082 | 0.009 | 0.029  | 0.010 | 0.007 | 0.050   | 0.009  | 0.004   |
| C27 | 0.025 | 0.039 | 0.066 | 0.018  | 0.005 | 0.004 | 0.026   | 0.005  | 0.003   |
| C28 | 0.011 | 0.016 | 0.058 | 0.008  | 0.002 | 0.002 | 0.012   | 0.002  | 0.002   |
| C29 | 0.007 | 0.007 | 0.034 | 0.004  | 0.001 | 0.002 | 0.007   | 0.001  | 0.001   |
| C30 | 0.003 | 0.005 | 0.019 | 0.002  | nd    | 0.001 | 0.003   | 0.001  | 0.0004  |
| C31 | 0.004 | 0.005 | 0.032 | 0.001  | 0.005 | 0.001 | 0.002   | nd     | 0.00005 |
| C32 | 0.003 | 0.002 | 0.033 | 0.001  | 0.003 | nd    | 0.001   | 0.0004 | nd      |
| C33 | 0.003 | 0.002 | 0.034 | 0.001  | nd    | nd    | 0.00003 | nd     | nd      |
| C34 | 0.002 | 0.003 | 0.033 | 0.001  | 0.002 | nd    | nd      | 0.0002 | nd      |
| C35 | 0.002 | 0.003 | 0.047 | 0.001  | nd    | nd    | nd      | 0.0002 | nd      |
| C36 | 0.001 | 0.003 | 0.059 | 0.0004 | nd    | nd    | nd      | nd     | nd      |
| C37 | nd    | 0.002 | 0.071 | nd     | nd    | nd    | nd      | nd     | nd      |
| C38 | 0.002 | 0.005 | 0.094 | 0.001  | nd    | nd    | nd      | nd     | nd      |
| C39 | 0.002 | 0.006 | 0.116 | 0.001  | nd    | nd    | nd      | nd     | nd      |
| C40 | 0.001 | 0.005 | 0.005 | 0.001  | nd    | nd    | nd      | nd     | nd      |

|       |        |        |        |         |         |        |        |        |        |
|-------|--------|--------|--------|---------|---------|--------|--------|--------|--------|
| Nap   | 0.012  | 0.010  | 0.006  | 0.004   | nd      | 0.001  | nd     | 0.004  | nd     |
| Acy   | 0.006  | 0.007  | 0.006  | 0.002   | nd      | nd     | nd     | 0.001  | nd     |
| Ace   | 0.002  | 0.002  | 0.001  | 0.0004  | nd      | nd     | nd     | 0.0002 | nd     |
| Flu   | nd     | 0.0001 | 0.006  | 0.00001 | nd      | nd     | 0.0004 | nd     | nd     |
| Phe   | 0.001  | 0.003  | 0.017  | 0.0004  | 0.0002  | 0.001  | 0.103  | 0.001  | 0.001  |
| Ant   | 0.0001 | 0.001  | 0.002  | 0.00003 | nd      | nd     | 0.005  | nd     | 0.001  |
| Fluo  | 0.004  | 0.069  | 0.027  | 0.004   | 0.001   | 0.009  | 0.032  | 0.004  | 0.003  |
| Pyr   | 0.013  | 0.087  | 0.004  | 0.006   | 0.002   | 0.026  | 0.382  | 0.022  | 0.008  |
| BaA   | 0.002  | 0.019  | 0.005  | 0.001   | 0.0001  | 0.002  | 0.001  | 0.001  | 0.0002 |
| Chry  | 0.005  | 0.025  | 0.001  | 0.001   | 0.0001  | 0.005  | 0.002  | 0.001  | 0.001  |
| BbF   | 0.001  | 0.007  | 0.001  | 0.001   | nd      | 0.001  | 0.001  | 0.0004 | nd     |
| BkF   | 0.0001 | 0.002  | 0.001  | 0.0001  | nd      | 0.0002 | 0.0002 | 0.0001 | nd     |
| BaP   | nd     | 0.001  | 0.0004 | 0.00002 | nd      | nd     | 0.0001 | nd     | nd     |
| IcdP  | 0.001  | 0.001  | 0.001  | 0.002   | nd      | nd     | 0.0001 | nd     | nd     |
| DahA  | nd     | 0.0003 | 0.001  | nd      | 0.0001  | 0.002  | 0.002  | 0.0004 | 0.0001 |
| BghiP | 0.004  | 0.003  | nd     | 0.005   | 0.001   | 0.009  | 0.009  | 0.002  | 0.001  |
| ABB   | 0.0003 | 0.001  | 0.004  | 0.0001  | 0.00002 | 0.001  | 0.001  | 0.001  | 0.0001 |
| AAA   | 0.0003 | 0.001  | 0.007  | 0.0001  | 0.00005 | 0.001  | 0.001  | 0.0005 | 0.0002 |
| Tm    | 0.001  | 0.001  | 0.003  | 0.0001  | 0.001   | 0.001  | 0.002  | 0.001  | 0.0003 |
| 30AB  | 0.002  | 0.005  | 0.036  | 0.0004  | 0.001   | 0.007  | 0.010  | 0.004  | 0.002  |
| 29AB  | 0.002  | 0.004  | 0.036  | 0.0003  | 0.001   | 0.007  | 0.007  | 0.005  | 0.002  |

---

nd not detected;
